# Supplementary material
Source: Research Square preprint supplement (doi:10.21203/rs.3.rs-9355661/v1)
Supplement: Supplementary file 1 [file edb1453145bb15ada31e26cd.xlsx]

## Sheet: Supplementary Table 1
HGNC-harmonized gene lists from all databases
ICIMD	Treatable ID	Metabolic Treatabolome	DDIEM	GeneReviews
A4GALT	ABCC8	ABAT	CYP17A1	AARS1
AAGAB	ABCD1	ABCB11	L2HGDH	AARS2
AARS1	ABCD4	ABCB4	POLG	ABCA1
AARS2	ACAD9	ABCC8	SLC25A1	ABCA12
AASS	ACAT1	ABCD1	HSD17B10	ABCA3
ABAT	AGA	ABCD4	ACADSB	ABCA4
ABCA1	AHCY	ACAD9	MCCC1	ABCB11
ABCA12	ALDH5A1	ACADM	HADH	ABCB4
ABCB11	ALDH7A1	ACADVL	ALDH6A1	ABCC6
ABCB4	AMT	ACAT1	AUH	ABCC8
ABCB6	AP1S1	ADA	PTS	ABCC9
ABCB7	ARG1	AGA	QDPR	ABCD1
ABCC2	ARSA	AGL	MT-TP	ABCD4
ABCC6	ASL	AGXT	CP	ABCG5
ABCC8	ASS1	AHCY	CRAT	ABCG8
ABCD1	ATP7A	AK2	SLC39A4	ACADM
ABCD3	ATP7B	AKR1D1	HMBS	ACADS
ABCD4	BCKDHA	AKT2	APRT	ACADVL
ABCG5	BCKDHB	ALAD	ADA	ACD
ABCG8	BCKDK	ALAS2	AMPD1	ACTA2
ABHD12	BTD	ALDH5A1	ABCD1	ACTB
ABHD5	CA5A	ALDH7A1	GBE1	ACTC1
ACACA	CAD	ALDOB	SLC25A13	ACTG1
ACACB	CBS	ALG5	PLA2G6	ACTG2
ACAD8	COQ5	ALPL	MRPL44	ACTN2
ACAD9	COQ8A	AMN	HSD3B7	ACVR1
ACADM	CP	AMT	AKR1D1	ACVRL1
ACADS	CPS1	AP1S1	HGD	ADA
ACADSB	CYP27A1	APOA5	SERPINA1	ADA2
ACADVL	DBT	APOB	MAN2B1	ADAMTS10
ACAT1	DDC	APOC2	ARG1	ADAMTS17
ACAT2	DHCR7	APOE	ASL	ADAMTSL2
ACBD5	DHFR	APRT	DDC	ADAMTSL4
ACER3	DNAJC12	ARG1	PRPS1	ADAR
ACO2	ECHS1	ARSA	AGA	ADCY5
ACOX1	ETFA	ARSB	TTPA	ADGRA3
ACOX2	ETFB	ASL	ATM	ADGRV1
ACSF3	ETFDH	ASS1	APTX	ADNP
ACSL4	ETHE1	ATAD1	TF	AFG3L2
ACY1	FARSB	ATP5F1B	DNAJC5	AGA
ADA	FOLR1	ATP7A	PPT1	AGBL5
ADA2	FUCA1	ATP7B	CLN3	AGL
ADAR	GAMT	ATP8B1	CLN6	AGPAT2
ADARB1	GATM	BAAT	ACD	AGRN
ADAT3	GCDH	BCKDHA	COQ8A	AGXT
ADCK2	GCH1	BCKDHB	B4GALT1	AHDC1
ADK	GLDC	BCKDK	MPI	AHI1
ADSL	GLUL	BPGM	PGM1	AIFM1
ADSS1	GOT2	BTD	SLC35C1	AIP
AFG3L2	GRIN1	C2orf69	ALPL	AIPL1
AGA	GRIN2A	CA5A	NSDHL	AKR1D1
AGK	GRIN2B	CAD	ABHD5	AKT1
AGL	GRIN2D	CBLIF	CYP27A1	AKT3
AGMO	GUSB	CBS	FOLR1	ALAS2
AGPAT2	HIBCH	CD320	MTHFR	ALDH18A1
AGPS	HLCS	COQ5	AVP	ALDH5A1
AGXT	HMGCL	COQ6	SLC25A20	ALDH7A1
AGXT2	HMGCS2	COQ8A	CPT1B	ALDOB
AHCY	IARS1	CP	CPT1A	ALG1
AICDA	IDS	CPS1	CPS1	ALG11
AIFM1	IDUA	CPT1A	BTD	ALG12
AIMP1	IVD	CPT2	SLC19A3	ALG13
AIMP2	LARS1	CTNS	ACAT1	ALG14
AK1	LMBRD1	CTPS1	SLC12A1	ALG2
AK2	MAN2B1	CYP11B1	KCNJ1	ALG3
AK7	MARS1	CYP17A1	BSND	ALG5
AKR1C2	MFSD8	CYP21A2	CLCNKB	ALG6
AKR1D1	MMAA	CYP27A1	MAGED2	ALG8
AKT2	MMAB	DBT	TAFAZZIN	ALG9
ALAD	MMACHC	DDC	LIPA	ALK
ALAS2	MMADHC	DHCR7	ANKH	ALMS1
ALB	MMUT	DHFR	SAR1B	ALOX12B
ALDH18A1	MOCS1	DLAT	COG1	ALOXE3
ALDH1L2	MT-CO1	DLD	CDAN1	ALPK1
ALDH3A2	MT-CO2	DNAJC12	GLYCTK	ALPK3
ALDH4A1	MT-CO3	ECHS1	HSD17B4	ALPL
ALDH5A1	MT-ND1	ETFA	D2HGDH	ALS2
ALDH6A1	MT-ND4	ETFB	CTNS	ALX4
ALDH7A1	MT-ND5	ETFDH	UGT1A1	AMACR
ALDOA	MT-ND6	ETHE1	UROS	AMER1
ALDOB	MT-TF	FAH	DNAJC19	AMT
ALG1	MT-TH	FARSB	PHKB	ANAPC1
ALG11	MT-TL1	FBP1	PHKA2	ANG
ALG12	MT-TQ	FOLR1	PHKG2	ANGPTL3
ALG13	MT-TS1	FUCA1	GYS2	ANKH
ALG14	MT-TS2	G6PC1	ALDOA	ANKRD1
ALG2	MT-TW	GAA	ENO3	ANKRD11
ALG3	MTHFR	GALC	G6PC1	ANKRD17
ALG6	MTHFS	GALE	SLC37A4	ANKRD26
ALG8	MTR	GALK1	AGL	ANKS6
ALG9	MTRR	GALNT3	PYGM	ANO10
ALOX12B	NAGS	GALT	PYGL	ANO3
ALOXE3	NAXE	GAMT	PFKM	ANO5
ALPI	NFE2L2	GATM	GNMT	ANOS1
ALPL	NPC1	GBA1	GGT1	ANTXR2
AMACR	NPC2	GBE1	GSS	ANXA11
AMN	OTC	GCDH	GCDH	AOPEP
AMPD1	PAH	GCH1	ETFA	AP1B1
AMPD2	PCCA	GCSH	SUGCT	AP1S1
AMPD3	PCCB	GLA	GLUL	AP3B1
AMT	PDHA1	GLDC	FTCD	AP3D1
ANGPTL3	PDP1	GLUD1	SLC5A1	AP4B1
ANPEP	PHGDH	GLUL	SLC2A1	AP4E1
AP1B1	PIGA	GNE	SLC12A3	AP4M1
AP1S1	PIGM	GOT2	GBA1	AP4S1
AP1S2	PIGO	GPIHBP1	CTH	AP5Z1
AP2S1	PMM2	GRIN1	ABAT	APC
AP3B1	PNPO	GRIN2A	CTSA	APOB
AP3B2	PRPS1	GRIN2B	GALK1	APOE
AP3D1	PSAT1	GRIN2D	FH	APP
AP4B1	PSPH	GUSB	FKTN	APPL1
AP4E1	PTS	GYS2	FUCA1	APRT
AP4M1	QDPR	HADHA	FBP1	APTX
AP4S1	SARS1	HADHB	LCAT	AQP2
AP5Z1	SLC18A2	HAMP	FA2H	AQP4
APOA1	SLC19A3	HIBCH	MED12	AR
APOA5	SLC25A12	HJV	ASAH1	ARG1
APOB	SLC25A13	HLCS	SLC2A2	ARHGAP11B
APOC2	SLC25A15	HMBS	LMNA	ARID1A
APOC3	SLC25A19	HMGCL	UMOD	ARID1B
APOE	SLC2A1	HMGCS2	CASR	ARID2
APOO	SLC35A2	HSD3B2	GNA11	ARL13B
COA8	SLC35C1	HSD3B7	AP2S1	ARL2BP
APPL1	SLC39A8	IARS1	APOA5	ARL 3.00
APRT	SLC46A1	IDS	ABCA1	ARL 6.00
AR	SLC5A6	IDUA	GLA	ARSA
ARCN1	SLC6A8	INS	SUCLA2	ARSL
ARFGEF2	SPR	IVD	MTCH1	ASAH1
ARG1	TAT	JAGN1	FECH	ASL
ARSA	TCN2	KCNJ11	ETHE1	ASNS
ARSB	TH	LARS1	ABCC2	ASPA
ARSG	TMLHE	LCAT	DPM1	ASPM
ASAH1	TPK1	LDLR	DPM2	ASS1
ASL	TPP1	LDLRAP1	DPM3	ASXL1
ASNS		LMBRD1	KRT5	ASXL2
ASPA		LMF1	DBH	ASXL3
ASS1		LPL	GCH1	ATF6
ATAD1		MAN2B1	TH	ATL1
ATAD3A		MARS1	DOLK	ATM
ATG5		MC2R	DPYD	ATN1
ATIC		MCCC1	DPYS	ATP13A2
ATP13A2		MCCC2	DLD	ATP1A2
ATP5F1A		MCEE	SLC1A1	ATP1A3
ATP5F1D		MFSD8	ATN1	ATP2B4
ATP5F1E		MMAA	DHCR24	ATP5MK
ATP5MK		MMAB	RPS19	ATP5PO
ATP5PO		MMACHC	OAT	ATP6V0A2
ATP6AP1		MMADHC	GAMT	ATP6V0A4
ATP6AP2		MMUT	LBR	ATP6V1B1
ATP6V0A2		MOCS1	BCS1L	ATP7A
ATP6V1A		MRAP	ST3GAL5	ATP7B
ATP6V1E1		MTHFD1	GLB1	ATP8B1
ATP7A		MTHFR	NPC2	ATRX
ATP7B		MTHFS	NPC1	ATXN1
ATP8A2		MTR	CTSC	ATXN10
ATP8B1		MTRR	SLC6A19	ATXN2
ATPAF2		NAGS	HPD	ATXN3
AUH		NAXE	HFE	ATXN7
B3GALNT2		NFE2L2	HJV	ATXN8
B3GALT6		NPC1	TFR2	ATXN8OS
B3GAT3		NPC2	LIPC	AVPR2
B3GLCT		NR1H4	UROD	AXL
B4GALNT1		NUP107	APOB	B3GLCT
B4GALT1		OAT	TDO2	B4GALT1
B4GALT7		OTC	PRODH	B9D1
B4GAT1		OXCT1	ALDH4A1	B9D2
BAAT		PAH	PCBD1	BAAT
BBOX1		PCBD1	AASS	BAG3
BCAP31		PCCA	APOE	BAP1
BCAT2		PCCB	GLUD1	BBIP1
BCKDHA		PDHA1	GCK	BBS1
BCKDHB		PDHB	GK	BBS10
BCKDK		PDHX	PIGM	BBS12
BCS1L		PDP1	MVK	BBS2
BLK		PDXK	KYNU	BBS4
BLOC1S3		PGM1	IDUA	BBS5
BLOC1S6		PHGDH	CBS	BBS7
BLVRA		PIGA	GATM	BBS9
BMP6		PIGM	LDHA	BCKDHA
BMS1		PIGO	LDHB	BCKDHB
BOLA3		PIK3CG	SC5D	BCL11A
BPNT2		PLPBP	HADHA	BCS1L
BSCL2		PMM2	MT-ND1	BEAN1
BTD		PNPO	MT-ND4	BEST1
MTRFR		PRPS1	LRPPRC	BGN
C1GALT1C1		PSAT1	HPRT1	BICRA
C1QBP		PSPH	ABCC8	BLK
CA5A		PTS	CTDSP2	BLM
CAD		PYGM	DARS2	BLOC1S3
CANT1		QDPR	FKRP	BLOC1S5
CARS1		RBM28	POMT1	BLOC1S6
CARS2		RPL11	ANO5	BMPR1A
CAT		RPL15	DYSF	BMPR1B
CBLIF		RPL18	CAPN3	BMPR2
CBS		RPL26	SGCA	BRAF
VMA22		RPL27	SGCG	BRCA1
CCS		RPL35	LMF1	BRCA2
CD320		RPL35A	LIAS	BRD4
CEP89		RPL5	ECM1	BRIP1
CERS1		RPS10	OCRL	BSCL2
CERS2		RPS15A	SLC7A7	BSND
CERS3		RPS17	MLYCD	BTD
CETP		RPS19	MAN1B1	BTK
CHAT		RPS26	NAGA	C19orf12
CHCHD10		RPS27	IVD	C1R
CHCHD2		RPS28	ACAD8	C1S
CHKB		RPS29	CBLIF	C2CD3
CHRNE		RPS7	IGF1	C3
CHST11		RRM2B	TWNK	C9orf72
CHST14		SAMHD1	SLC17A5	CA4
CHST3		SAR1B	GNE	CA5A
CHST6		SARS1	GNPTAB	CABP4
CHSY1		SEC23B	CUBN	CACNA1A
CLCN2		SI	SLC36A2	CACNA1C
CLN3		SLC16A1	MYH2	CACNA1F
CLN5		SLC18A2	HMGCL	CACNA1S
CLN6		SLC19A2	LPIN1	CACNA2D1
CLN8		SLC19A3	MT-CO1	CACNB2
CLP 1		SLC22A5	MT-TK	CALM1
CLPB		SLC25A12	CHST14	CALM2
CLPP		SLC25A13	PHKA1	CALM3
CLPX		SLC25A15	CHKB	CALR3
CLTC		SLC25A19	POMGNT1	CAPN3
CMPK2		SLC25A20	POMT2	CASK
CNDP1		SLC25A32	LARGE1	CASP10
COA3		SLC25A36	CRPPA	CASP14
COA5		SLC27A5	POMGNT2	CASQ2
COA6		SLC2A1	DAG1	CASR
COA7		SLC2A2	RXYLT1	CATSPER2
COASY		SLC30A10	B3GALNT2	CAV1
COG1		SLC31A1	POMK	CAV3
COG2		SLC35A2	B4GAT1	CBS
COG4		SLC35C1	SUMF1	CC2D2A
COG5		SLC37A4	RET	CCDC141
COG6		SLC39A14	PIGN	CCDC22
COG7		SLC39A4	PIGA	CCDC39
COG8		SLC39A7	PIGT	CCDC40
CERT1		SLC39A8	MANBA	CCDC50
COPA		SLC40A1	BCKDHA	CCDC8
COPB2		SLC46A1	BCKDHB	CCM2
COQ2		SLC51A	DBT	CCN6
COQ4		SLC52A2	PAH	CCND2
COQ5		SLC52A3	MT-TL1	CCNO
COQ6		SLC5A1	PNPO	CD151
COQ7		SLC5A6	DHFR	CD40LG
COQ8A		SLC6A6	ATP7A	CD46
COQ8B		SLC6A8	MAT1A	CDAN1
COQ9		SPR	MMACHC	CDC73
COX10		STAR	MMADHC	CDH1
COX14		TAT	MTR	CDH23
COX15		TCN2	MTRR	CDIN1
COX20		TF	POLG2	CDK13
COX4I1		TFR2	SLC25A4	CDKL5
COX4I2		TH	RNASEH1	CDKN1B
COX5A		TK2	TK2	CDKN1C
COX6A1		TMLHE	DGUOK	CDKN2A
COX6A2		TPK1	RRM2B	CDON
COX6B1		TPP1	TOP3A	CDR2
COX7B		TRMU	DNA2	CEBPA
COX8A		TSR2	FXN	CEL
CP		TTPA	MT-TE	CENPF
CPOX		UMPS	MT-TQ	CEP104
CPS1		UQCRC1	MT-TH	CEP120
CPT1A		UROD	MT-TC	CEP164
CPT1C		UROS	MT-TS1	CEP290
CPT2		VPS16	MT-ND5	CEP41
CRAT			MT-ND6	CEP83
CRPPA			MT-TS2	CERKL
CSGALNACT1			SLC6A20	CERS3
CTH			MT-CYB	CETP
CTNS			MT-CO3	CFAP221
CTPS1			MT-ND4L	CFAP298
CTSA			POGLUT1	CFAP300
CTSB			SPR	CFAP410
CTSC			RPL35A	CFAP418
CTSD			RPL11	CFAP54
CTSF			RPS10	CFAP57
CTSK			RPL5	CFAP74
CUBN			RPS7	CFB
CYB561			RPS17	CFH
CYB5A			RPS24	CFHR1
CYB5R3			RPS26	CFHR3
CYC1			GATA1	CFHR4
CYCS			MCCC2	CFHR5
CYP11A1			ETFB	CFI
CYP11B1			ETFDH	CFTR
CYP11B2			HAMP	CHAT
CYP17A1				CHCHD10
CYP19A1				CHD2
CYP21A2				CHD4
CYP27A1				CHD7
CYP2U1				CHD8
CYP4F22				CHEK2
CYP51A1				CHKB
CYP7A1				CHM
CYP7B1				CHMP2B
D2HGDH				CHN1
DALRD3				CHRNA1
DARS1				CHRNA2
DARS2				CHRNA4
DBH				CHRNA7
DBT				CHRNB1
DCXR				CHRNB2
DDC				CHRND
DDHD1				CHRNE
DDHD2				CHST14
DDOST				CHST3
DEGS1				CIB2
DGAT1				CLCF1
DGKE				CLCN1
DGUOK				CLCN2
DHCR24				CLCN4
DHCR7				CLCN5
DHDDS				CLCN7
DHFR				CLDN14
DHODH				CLDN2
DHTKD1				CLIC2
DIABLO				CLN3
DKC1				CLN5
DLAT				CLN6
DLD				CLN8
DLST				CLPB
DMGDH				CLPP
DNA2				CLRN1
DNAJC12				CLTCL1
DNAJC19				CLUAP1
DNAJC21				CLXN
DNAJC5				CNBP
DNAJC6				CNGA1
DNM1				CNGA3
DNM1L				CNGB1
DNM2				CNGB3
DOLK				CNOT1
DPAGT1				COA6
DPM1				COASY
DPM2				COCH
DPM3				COG1
DPYD				COG2
DPYS				COG4
DSE				COG5
DTNBP1				COG6
DTYMK				COG7
DUT				COG8
DYM				COL10A1
DYNC1H1				COL11A1
EARS2				COL11A2
EBP				COL13A1
ECHS1				COL17A1
EFL1				COL1A1
EHHADH				COL1A2
EIF6				COL2A1
ELAC2				COL3A1
ELOVL1				COL4A1
ELOVL4				COL4A3
ELOVL5				COL4A4
ELP1				COL4A5
ELP2				COL5A1
EMC1				COL5A2
EMG1				COL6A1
ENO3				COL6A2
ENPP1				COL6A3
ENTPD1				COL7A1
EOGT				COL9A1
EPG5				COL9A2
EPHX1				COL9A3
EPM2A				COLQ
EPRS1				COMP
ERAL1				COQ2
ESR1				COQ4
ESR2				COQ5
ETFA				COQ6
ETFB				COQ7
ETFDH				COQ8A
ETHE1				COQ8B
EXT1				COQ9
EXT2				COX10
EXTL3				COX15
FA2H				COX4I1
FAAH2				COX7B
FAH				COX8A
FAM20B				COXFA4
FAR1				CP
FARS2				CPA1
FARSA				CPLANE1
FARSB				CPOX
FASTKD2				CPS1
FBP1				CPT1A
FBXL4				CPT1C
FDFT1				CPT2
FDPS				CRB1
FDX2				CREBBP
FDXR				CRH
FECH				CRLF1
FH				CRX
FIG4				CSF1R
FKRP				CSNK2A1
FKTN				CSNK2B
FLAD1				CSPP1
FMO3				CSRP3
FOLR1				CSTB
FOXRED1				CTC1
FTCD				CTCF
FTH1				CTDP1
FTL				CTNNA1
FTSJ1				CTNNB1
FUCA1				CTNS
FCSK				CTR9
FUT8				CTRC
FXN				CTSD
G6PC1				CTSF
G6PC3				CTSK
G6PD				CUL3
GAA				CUL7
GABBR2				CYBA
GABRA1				CYBB
GABRA6				CYBC1
GABRB1				CYLD
GABRB2				CYP1B1
GABRB3				CYP21A2
GABRD				CYP27A1
GABRG2				CYP4F22
GAD1				CYP4V2
GALC				CYP7B1
GALE				DAB1
GALK1				DAO
GALM				DAP3
GALNS				DARS2
GALNT14				DBH
GALNT3				DBT
GALT				DCAF17
GAMT				DCC
GANAB				DCDC2
GARS1				DCN
GATA1				DCT
GATB				DCTN1
GATC				DCX
GATM				DDB2
GBA1				DDC
GBA2				DDHD1
GBE1				DDOST
GCDH				DDX11
GCH1				DDX3X
GCK				DDX3Y
GCLC				DDX41
GDAP1				DEPDC5
GFER				DES
GFM1				DGKE
GFM2				DGUOK
GFPT1				DHCR7
GGCX				DHDDS
GGPS1				DHH
GGT1				DHX37
GK				DHX38
GLA				DIAPH1
GLB1				DICER1
GLDC				DISP1
GLRA1				DKC1
GLRB				DLAT
GLRX5				DLD
GLS				DLG4
GLUD1				DLL1
GLUL				DLL3
GLYCTK				DMD
GM2A				DMPK
GMPPA				DMRT1
GMPPB				DNAAF1
GNE				DNAAF11
GNMT				DNAAF19
GNPAT				DNAAF2
GNPNAT1				DNAAF3
GNPTAB				DNAAF4
GNPTG				DNAAF5
GNS				DNAAF6
GON7				DNAH1
GORAB				DNAH10
GOSR2				DNAH11
GOT2				DNAH5
GPAA1				DNAH7
GPD1				DNAH9
GPHN				DNAI1
GPI				DNAI2
GPIHBP1				DNAJB11
GPT2				DNAJB13
GPX4				DNAJB2
GRHPR				DNAJC21
GRIA2				DNAJC30
GRIA3				DNAJC5
GRIA4				DNAJC6
GRID2				DNAL1
GRIN1				DNM1L
GRIN2A				DNM2
GRIN2B				DNMT1
GRIN2D				DNMT3A
GRM1				DNMT3B
GRM6				DOK7
GRN				DOLK
GSR				DPAGT1
GSS				DPF2
GSTZ1				DPM1
GTPBP3				DPM2
GUF1				DPM3
GUSB				DRC1
GYG1				DRC2
GYG2				DRC4
GYS1				DSC2
GYS2				DSE
H6PD				DSG2
HAAO				DSP
HACD1				DSPP
HADH				DST
HADHA				DTHD1
HADHB				DTNBP1
HAL				DUSP6
HAMP				DUX4L1
HAO1				DVL1
HARS1				DVL3
HARS2				DYNC1H1
HCCS				DYNC2H1
HCFC1				DYNC2LI1
HEPHL1				DYRK1A
HEXA				DYSF
HEXB				EARS2
HFE				EBF3
HGD				EBP
HGSNAT				ECHS1
HIBADH				ECM1
HIBCH				EDA
HJV				EDAR
HK1				EDARADD
HLCS				EED
HMBS				EEF2K
HMGCL				EFEMP2
HMGCS2				EFL1
HMOX1				EFTUD2
HNF1A				EGR2
HNF1B				EHMT1
HNF4A				EIF2AK2
HOGA1				EIF2AK3
HPD				EIF2B1
HPGD				EIF2B2
HPRT1				EIF2B3
HPS1				EIF2B4
HPS3				EIF2B5
HPS4				EIF4A2
HPS5				ELANE
HPS6				ELN
HS6ST1				ELOVL5
HS6ST2				ELP1
HSD11B1				EMC1
HSD11B2				EMC10
HSD17B10				EMD
HSD17B3				ENG
HSD17B4				ENPP1
HSD3B2				ENTPD1
HSD3B7				ENTREP1
HSPA9				EP300
HSPD1				EPB42
HSPE1				EPCAM
HTRA2				EPG5
HYAL1				EPHB4
HYKK				EPM2A
IARS1				EPOR
IARS2				ERAL1
IBA57				ERBB4
IDH1				ERCC1
IDH2				ERCC2
IDH3A				ERCC3
IDH3B				ERCC4
IDS				ERCC5
IDUA				ERCC6
IFIH1				ERCC8
IL1RAPL1				ERLIN2
IMPDH1				ESCO2
INPP5E				ESPN
INPP5K				ESRRB
INPPL1				ETFA
INS				ETFB
INSR				ETFDH
ISCA1				ETHE1
ISCA2				ETV6
ISCU				EVC
ITPA				EVC2
ITPR1				EXOC6B
ITPR2				EXOSC3
IVD				EXPH5
JAGN1				EXT1
KARS1				EXT2
KCNJ11				EYA1
KCTD7				EYA4
KDSR				EYS
KHK				EZH2
KIF1A				F2
KIF5A				F5
KIF5C				F8
KLF11				F9
KMO				FA2H
KYNU				FAAP100
L2HGDH				FAH
LACC1				FAM111A
LAGE3				FAM111B
LAMP2				FAM161A
LAP3				FAN1
LARGE1				FANCA
LARS1				FANCB
LARS2				FANCC
LBR				FANCD2
LCAT				FANCE
LCT				FANCF
LDHA				FANCG
LDHB				FANCI
LDHD				FANCL
LDLR				FANCM
LDLRAP1				FARS2
LFNG				FAS
LIAS				FASLG
LIPA				FASTKD2
LIPC				FBLN5
LIPE				FBN1
LIPH				FBN2
LIPT1				FBP1
LIPT2				FBXL4
LMAN1				FBXO7
LMBRD1				FBXW7
LMF1				FDFT1
LONP1				FECH
LPA				FERMT1
LPAR6				FEZF1
LPIN1				FGD4
LPIN2				FGF12
LPL				FGF14
LRPPRC				FGF17
LRRK2				FGF23
LSS				FGF3
LTC4S				FGF8
LYRM4				FGFR1
LYRM7				FGFR2
LYST				FGFR3
MAGT1				FH
MAN1B1				FHL1
MAN2B1				FIG4
MAN2B2				FKBP14
MANBA				FKTN
MAOA				FLCN
MAOB				FLNA
MARS1				FLNB
MARS2				FLRT3
MAT1A				FLT4
MAT2A				FMO3
MBOAT7				FMR1
MBTPS1				FN1
MC2R				FOLR1
MCAT				FOXC2
MCCC1				FOXE3
MCCC2				FOXG1
MCEE				FOXI1
MCFD2				FOXJ1
MCOLN1				FOXL2
MDH1				FOXP1
MDH2				FOXP2
MECR				FOXP3
MFF				FOXRED1
MFN2				FREM1
MFSD2A				FRMD7
MFSD8				FSCN2
MGAT2				FTL
MGME1				FUS
MICOS13				FXN
MICU1				G6PC1
MICU2				G6PC3
MIEF2				GAA
MIPEP				GALC
MLPH				GALE
MLYCD				GALNS
MMAA				GALNT3
MMAB				GALT
MMACHC				GAMT
PRDX1				GAN
MMADHC				GANAB
MMUT				GARS1
MOCOS				GAS2L2
MOCS1				GATA1
MOCS2				GATA6
MOCS3				GATM
MOGS				GBA1
MPC1				GBE1
MPDU1				GCDH
MPI				GCH1
MPST				GCK
MPV17				GDAP1
MRAP				GDF6
MRM2				GFAP
MRPL12				GFM1
MRPL24				GFM2
MRPL3				GFPT1
MRPL44				GGPS1
MRPS14				GGT1
MRPS16				GJA5
MRPS2				GJA8
MRPS22				GJB1
MRPS23				GJB2
MRPS25				GJB3
MRPS28				GJB6
MRPS34				GJC2
MRPS7				GK
MSMO1				GLA
MSTO1				GLB1
MT-ATP6				GLDC
MT-ATP8				GLI1
MT-CO1				GLI2
MT-CO2				GLI3
MT-CO3				GLIS2
MT-CYB				GLIS3
MT-ND1				GLRA1
MT-ND2				GLRB
MT-ND3				GLUD1
MT-ND4				GM2A
MT-ND4L				GMPPA
MT-ND5				GMPPB
MT-ND6				GNA11
MT-RNR1				GNAI1
MT-RNR2				GNAL
MT-TA				GNAO1
MT-TC				GNAS
MT-TD				GNAT2
MT-TE				GNB1
MT-TF				GNB4
MT-TG				GNB5
MT-TH				GNE
MT-TI				GNPTAB
MT-TK				GNPTG
MT-TL1				GNRH1
MT-TL2				GNRHR
MT-TM				GNS
MT-TN				GPC3
MT-TP				GPD1L
MT-TQ				GPHN
MT-TR				GPR101
MT-TS1				GPR143
MT-TS2				GPRC5B
MT-TT				GPSM2
MT-TV				GRHL2
MT-TW				GRHPR
MT-TY				GRIA2
MTAP				GRIN1
MTFMT				GRIN2A
MTHFD1				GRIN2B
MTHFR				GRIN2D
MTHFS				GRN
MTM1				GRXCR1
MTMR2				GSDME
MTO1				GTF2I
MTPAP				GTF2IRD1
MTR				GTPBP3
MTRR				GUCA1B
MTTP				GUCY2D
MVD				GUSB
MVK				H1-4
MYO5A				H19
NADK2				H3-3A
NADSYN1				H3-3B
NAGA				HAAO
NAGLU				HADH
NAGS				HADHA
NANS				HADHB
NAPB				HAMP
NARS1				HARS2
NARS2				HBA1
NAT8L				HBA2
NAXD				HBB
NAXE				HBZ
NBAS				HCCS
NBEAL2				HCFC1
NDST1				HCN4
NDUFA1				HDAC8
NDUFA10				HEATR3
NDUFA11				HEPACAM
NDUFA12				HES7
NDUFA13				HEXA
NDUFA2				HEXB
COXFA4				HFE
NDUFA6				HGD
NDUFA8				HGF
NDUFA9				HGSNAT
NDUFAF1				HIBCH
NDUFAF2				HJV
NDUFAF3				HK1
NDUFAF4				HLA-DQA1
NDUFAF5				HLA-DQB1
NDUFAF6				HMBS
NDUFAF7				HMGA2
NDUFAF8				HNF1A
NDUFB10				HNF1B
NDUFB11				HNF4A
NDUFB3				HNRNPA1
NDUFB8				HNRNPA2B1
NDUFB9				HNRNPH2
NDUFC2				HNRNPK
NDUFS1				HNRNPU
NDUFS2				HOGA1
NDUFS3				HOXA1
NDUFS4				HOXA13
NDUFS6				HPCA
NDUFS7				HPDL
NDUFS8				HPRT1
NDUFV1				HPS1
NDUFV2				HPS3
RMP64				HPS4
NEU1				HPS5
NEUROD1				HPS6
NFE2L2				HPSE2
NFS1				HRAS
NFU1				HS6ST1
NGLY1				HSD17B4
NHLRC1				HSD3B7
NME3				HSPB1
NMNAT1				HSPB8
NNT				HSPD1
NHP2				HTRA1
NOP10				HTRA2
NPC1				HTT
NPC2				HYAL2
NPL				HYCC1
NPM1				HYDIN
NR1H4				HYMAI
NR3C1				IARS2
NR3C2				IDH3B
NSDHL				IDS
NSUN2				IDUA
NSUN3				IFIH1
NT5C3A				IFT122
NT5E				IFT140
NUBPL				IFT172
NUDT15				IFT27
NUS1				IFT43
OAS1				IFT52
OAT				IFT74
OCRL				IGF2
ODC1				IGHMBP2
OGDH				IKBKG
OGT				IL17RD
OPA1				IL1RAPL1
OPA3				IL2RG
OPLAH				IMPDH1
OSGEP				IMPG2
OSTC				INPP5E
OTC				INPPL1
OXA1L				INS
OXCT1				INSR
PAH				INVS
PAICS				IPO8
PAM16				IQCB1
PANK2				IRF2BPL
PAPSS2				IRF6
PARN				ISCA1
PARS2				ISCA2
PAX4				ITGA6
PC				ITGB4
PCBD1				ITPR1
PCCA				IVD
PCCB				JAG1
PCK1				JAM2
PCK2				JPH2
PCSK1				JPH3
PCSK9				JUP
PCYT1A				KANSL1
PCYT2				KAT6B
PDE12				KATNIP
PDHA1				KCNA1
PDHB				KCNC1
PDHX				KCNC3
PDK3				KCND2
PDP1				KCND3
PDPR				KCNE1
PDSS1				KCNE2
PDSS2				KCNE3
PDX1				KCNE5
PDXK				KCNH2
PDZK1IP1				KCNJ11
PEPD				KCNJ13
PET100				KCNJ2
PET117				KCNJ5
PEX1				KCNJ8
PEX10				KCNK3
PEX11B				KCNK9
PEX12				KCNQ1
PEX13				KCNQ1OT1
PEX14				KCNQ2
PEX16				KCNQ3
PEX19				KCNQ4
PEX2				KCNT1
PEX26				KCTD7
PEX3				KDM3B
PEX5				KDM6A
PEX6				KDR
PEX7				KGD4
PFKM				KHDC3L
PGAM2				KIAA0586
PGAP1				KIAA1549
PGAP2				KIF12
PGAP3				KIF1A
PGK 1.00				KIF1B
PGM1				KIF21A
PGM3				KIF5A
PGR				KIF7
PHGDH				KISS1
PHKA1				KISS1R
PHKA2				KIZ
PHKB				KL
PHKG2				KLF10
PHYH				KLF11
PHYKPL				KLF13
PI4K2A				KLHL24
PI4KA				KLHL3
PIGA				KLHL7
PIGB				KMT2A
PIGC				KMT2B
PIGG				KMT2D
PIGH				KMT2E
PIGK				KPTN
PIGL				KRAS
PIGM				KRIT1
PIGN				KRT14
PIGO				KRT16
PIGP				KRT17
PIGQ				KRT5
PIGS				KRT6A
PIGT				KRT6B
PIGU				KRT6C
PIGV				KYNU
PIGW				L1CAM
PIGY				L2HGDH
PIK3C2A				LAMA2
PIK3CA				LAMA3
PIK3CD				LAMB2
PIK3R1				LAMB3
PIK3R2				LAMC2
PIK3R5				LAMP2
PIKFYVE				LARS2
PINK1				LCA5
PIP5K1C				LDB3
PISD				LDLR
PITRM1				LDLRAP1
PKLR				LFNG
PLA2G4A				LGI1
PLA2G6				LHFPL5
PLCB1				LHX1
PLCB3				LIAS
PLCB4				LIMK1
PLCD1				LIPA
PLCE1				LIPN
PLCG2				LIPT1
PLIN1				LITAF
PLIN5				LMBRD1
PLPBP				LMNA
PMM2				LMNB1
PMPCA				LMOD1
PMPCB				LMX1B
PMVK				LONP1
PNKD				LOX
PNP				LOXHD1
PNPLA1				LPIN2
PNPLA2				LPL
PNPLA4				LRAT
PNPLA6				LRIF1
PNPLA8				LRIG2
PNPO				LRMDA
PNPT1				LRP2
POFUT1				LRP4
POGLUT1				LRPPRC
POLG				LRRC56
POLG2				LRRK2
POLR1A				LRSAM1
POLR1B				LRTOMT
POLR1C				LSR
POLR1D				LTBP2
POLR3A				LTBP3
POLR3B				LTBP4
POLR3H				LYST
POLRMT				LZTFL1
POMGNT1				LZTR1
POMGNT2				MAD2L2
POMK				MAF
POMT1				MAFB
POMT2				MAGEL2
POP1				MAGT1
POR				MAK
PPA2				MAN1B1
PPCS				MAN2B1
PPM1K				MAP2K1
PPOX				MAP2K2
PPT1				MAP3K1
PRKAG2				MAPT
PRKCSH				MARS1
PRKN				MARVELD2
PRODH				MAT2A
PRODH2				MATN3
PRORP				MATR3
PRPS1				MAX
PRRT2				MBD5
PSAP				MBTPS1
PSAT1				MCEE
PSPH				MCIDAS
PSTPIP1				MCOLN1
PTCD3				MECP2
PTDSS1				MECR
PTEN				MED12
PTRH2				MED13L
PTS				MEF2C
PUS1				MEFV
PUS3				MEN1
PYCR1				MERTK
PYCR2				MESP2
PYGL				MFAP5
PYGM				MFF
QARS1				MFN2
QDPR				MFSD8
QRSL1				MGAT2
RAB18				MICAL1
RAB23				MID1
RAB27A				MIR96
RAB3GAP1				MKKS
RAB3GAP2				MKS1
RAB7A				MLC1
RARS1				MLH1
RARS2				MMAA
RBCK1				MMAB
RBSN				MMACHC
RFT1				MMADHC
RFX6				MMP2
RIC3				MMUT
RMND1				MN1
RMRP				MNX1
RNASEH1				MOBP
RNASEH2A				MOCS1
RNASEH2B				MOCS2
RNASEH2C				MOCS3
RNASET2				MOGS
RNF31				MOSMO
RPIA				MPC1
RPL10				MPDU1
RPL11				MPI
RPL13				MPV17
RPL15				MPZ
RPL18				MRAS
RPL21				MRPL3
RPL26				MRPL39
RPL27				MRPL49
RPL35				MRPS34
RPL35A				MSH2
RPL5				MSH6
RPS10				MSX2
RPS15A				MT-ATP6
RPS17				MT-CO1
RPS19				MT-CO2
RPS20				MT-CO3
RPS23				MT-CYB
RPS24				MT-ND1
RPS26				MT-ND2
RPS27				MT-ND3
RPS28				MT-ND4
RPS29				MT-ND4L
RPS7				MT-ND5
RPSA				MT-ND6
RRM2B				MT-RNR1
RTN4IP1				MT-TA
RUBCN				MT-TC
RXYLT1				MT-TD
SACS				MT-TF
SAMHD1				MT-TH
SAR1B				MT-TI
SARDH				MT-TK
SARS1				MT-TL1
SARS2				MT-TL2
SAT1				MT-TM
SBDS				MT-TP
SBF1				MT-TQ
SBF2				MT-TR
SC5D				MT-TS1
SCARB1				MT-TS2
SCARB2				MT-TT
SCO1				MT-TV
SCO2				MT-TW
SCP2				MT-TY
SCYL1				MTFMT
SCYL2				MTHFR
SDHA				MTM1
SDHAF1				MTMR2
SDHAF2				MTO1
SDHB				MTOR
SDHC				MTR
SDHD				MTRFR
SDR9C7				MTRR
SEC23A				MTTP
SEC23B				MUC1
SECISBP2				MUSK
SELENBP1				MUTYH
SELENOI				MVK
SEPSECS				MYBPC3
SERAC1				MYCN
SFXN4				MYH11
SGMS2				MYH14
SGPL1				MYH6
SGSH				MYH7
SHMT2				MYH9
SHPK				MYL2
SI				MYL3
SLC10A1				MYL9
SLC10A2				MYLK
SLC10A7				MYLK2
SLC11A2				MYO15A
SLC13A3				MYO1A
SLC13A5				MYO3A
SLC16A1				MYO5B
SLC17A5				MYO6
SLC18A2				MYO7A
SLC19A1				MYO9A
SLC19A2				MYOM1
SLC19A3				MYORG
SLC1A1				MYOZ2
SLC1A2				MYPN
SLC1A3				MYRF
SLC1A4				NAA60
SLC22A12				NADSYN1
SLC22A5				NAF1
SLC25A1				NAGLU
SLC25A10				NAGS
SLC25A11				NARS1
SLC25A12				NARS2
SLC25A13				NBN
SLC25A15				NCF1
SLC25A19				NCF2
SLC25A20				NCF4
SLC25A21				NDP
SLC25A22				NDRG1
SLC25A24				NDUFA1
SLC25A26				NDUFA10
SLC25A3				NDUFA12
SLC25A32				NDUFA2
SLC25A38				NDUFA9
SLC25A4				NDUFAF2
SLC25A42				NDUFAF5
SLC25A46				NDUFAF6
SLC26A1				NDUFB11
SLC26A2				NDUFS1
SLC27A4				NDUFS2
SLC27A5				NDUFS3
SLC28A1				NDUFS4
SLC29A1				NDUFS7
SLC29A3				NDUFS8
SLC2A1				NDUFV1
SLC2A10				NEFL
SLC2A2				NEK1
SLC2A9				NEK10
SLC30A10				NEK2
SLC30A2				NEK8
SLC30A9				NEUROD1
SLC33A1				NEXN
SLC35A1				NF1
SLC35A2				NF2
SLC35A3				NFIA
SLC35C1				NFIX
SLC35D1				NGF
SLC36A2				NGLY1
SLC6A20				NHLRC1
SLC37A4				NHP2
SLC38A8				NIPA1
SLC39A13				NIPAL4
SLC39A14				NIPBL
SLC39A4				NKX2-1
SLC39A8				NKX2-2
SLC3A1				NKX6-2
SLC40A1				NLRP2
SLC45A1				NLRP5
SLC46A1				NLRP7
SLC52A1				NME5
SLC52A2				NME8
SLC52A3				NMNAT1
SLC5A1				NOP10
SLC5A2				NOP56
SLC5A6				NOTCH1
SLC5A7				NOTCH2
SLC6A1				NOTCH3
SLC6A17				NPC1
SLC6A19				NPC2
SLC6A2				NPHP1
SLC6A3				NPHP3
SLC6A5				NPHP4
SLC6A6				NPRL2
SLC6A8				NPRL3
SLC6A9				NR0B1
SLC7A14				NR1H4
SLC7A2				NR2E3
SLC7A3				NR2F1
SLC7A5				NR5A1
SLC7A7				NRAS
SLC7A9				NRL
SLC9A7				NSD1
SLCO1B1				NSDHL
SLCO1B3				NSMF
SLCO2A1				NTHL1
SMPD1				NTN1
SMPD4				NTRK1
SMS				NYNRIN
SNAP25				NYX
SNAP29				OBSCN
SNORD118				OBSL1
SNX14				OCA2
SORCS3				OCRL
SORD				ODAD1
AFG2A				ODAD2
SPG11				ODAD3
SPART				ODAD4
SPG7				ODC1
SPNS2				OFD1
SPR				OGFRL1
SPTLC1				OPA3
SPTLC2				OPTN
SQOR				OTC
SRD5A2				OTOA
SRD5A3				OTOF
SSBP1				OTUD7A
SSR3				OTX2
SSR4				P2RX2
ST3GAL3				PABPN1
ST3GAL5				PACS1
STAP1				PADI6
STAR				PAFAH1B1
STAT2				PAH
STEAP3				PALB2
STS				PANK2
STT3A				PARK7
STT3B				PARN
STX11				PAX2
STX1B				PAX3
STXBP1				PAX4
STXBP2				PAX6
SUCLA2				PC
SUCLG1				PCARE
SUGCT				PCCA
SULT2B1				PCCB
SUMF1				PCDH15
SUOX				PCNT
SURF1				PCSK9
SV2A				PDCD10
SYN1				PDCL3
SYNJ1				PDE6A
SYT1				PDE6B
SYT14				PDE6C
SYT2				PDE6D
TACO1				PDE6G
TAF1A				PDE6H
TALDO1				PDGFB
TANGO2				PDGFRB
TARS1				PDHA1
TARS2				PDHB
TAT				PDHX
TAFAZZIN				PDK3
TBC1D24				PDLIM3
TBK1				PDP1
TBXAS1				PDSS1
TCN1				PDSS2
TCN2				PDX1
TCOF1				PDZD9
TDO2				PEPD
TECPR2				PET100
TECR				PEX1
TF				PEX10
TFAM				PEX11B
TFR2				PEX12
TFRC				PEX13
TH				PEX14
THAP11				PEX16
THG1L				PEX19
TIMM22				PEX2
TIMM50				PEX26
TIMM8A				PEX3
TIMMDC1				PEX5
TK2				PEX6
TKFC				PEX7
TKT				PFN1
TMEM126A				PGM1
TMEM126B				PGM3
TMEM165				PHEX
STING1				PHGDH
VMA12				PHKA1
TMEM70				PHKA2
TMLHE				PHKB
TMPRSS6				PHKG2
TOMM70				PHOX2A
TOP3A				PHOX2B
TOR1A				PHYH
TP53RK				PI4KA
TPI1				PIGN
TPK1				PIK3CA
TPMT				PIK3CD
TPP1				PIK3R1
TPRKB				PIK3R2
TRAK1				PINK1
TRAPPC11				PJVK
TRAPPC12				PKD1
TRAPPC2				PKD2
TRAPPC2L				PKHD1
TRAPPC4				PKP2
TRAPPC6B				PLA2G6
TRAPPC9				PLAG1
TREH				PLAGL1
TREX1				PLEC
TRIP11				PLN
TRIT1				PLOD1
TRMT1				PLP1
TRMT10A				PLPBP
TRMT10C				PMM2
TRMT5				PMP2
TRMU				PMP22
TRNT1				PMS2
TSEN15				PNKD
TSEN2				PNKP
TSEN34				PNPLA1
TSEN54				PNPLA6
TSFM				PNPO
TSR2				POC1B
TTC19				POGZ
TTPA				POLG
TUFM				POLH
TUSC3				POLR1B
TWNK				POLR1C
TXN2				POLR1D
TXNRD2				POLR3A
TYMP				POLR3B
TYR				POLR3E
UBIAD1				POMGNT1
UBTF				POR
UCP2				PORCN
UGCG				POT1
UGDH				POU3F4
UGP2				POU4F3
UGT1A1				PPOX
UMPS				PPP1R12A
UNC13D				PPP2R1A
UNG				PPP2R2B
UPB1				PPP2R5D
UQCC2				PPT1
UQCC3				PRCD
UQCRB				PRDM12
UQCRC2				PREPL
UQCRFS1				PRF1
UQCRQ				PRICKLE1
UROC1				PRKACA
UROD				PRKACB
UROS				PRKAR1A
VAC14				PRKCG
VAMP1				PRKG1
VAMP2				PRKN
VAPB				PRKRA
VARS1				PRNP
VARS2				PROK2
VIPAS39				PROKR2
VKORC1				PROM1
VLDLR				PROP1
VMA21				PRORP
VPS11				PRPF3
VPS13A				PRPF31
VPS13B				PRPF6
VPS13C				PRPF8
VPS13D				PRPH2
VPS33A				PRPS1
VPS33B				PRRT2
VPS45				PRSS1
WARS1				PRX
WARS2				PSAT1
WDR4				PSEN1
WDR45				PSEN2
XDH				PSPH
XPNPEP3				PTCH1
XYLT1				PTEN
XYLT2				PTF1A
YARS1				PTH1R
YARS2				PTPN11
YME1L1				PTPRQ
YRDC				PTS
ZFYVE26				PURA
ZNF143				PYGL
ALG5				PYGM
ATP5F1B				RAB18
BPGM				RAB32
C2orf69				RAB39B
GCSH				RAB3GAP1
NUP107				RAB3GAP2
PIK3CG				RAB7A
RBM28				RAD21
SLC25A36				RAD51
SLC31A1				RAD51C
SLC39A7				RAF1
SLC51A				RAI1
UQCRC1				RANGRF
VPS16				RAPSN
				RASA1
				RASA2
				RB1
				RBM20
				RBM8A
				RBP3
				RD3
				RDH12
				RDX
				RECQL4
				REEP1
				REEP2
				RELN
				REN
				RERE
				REST
				RET
				RETREG1
				RFC1
				RFT1
				RFWD3
				RFX6
				RGR
				RHO
				RIPPLY2
				RIT1
				RLBP1
				RMND1
				RMRP
				RNASEH2A
				RNASEH2B
				RNASEH2C
				RNU4ATAC
				ROM1
				ROR2
				RP1
				RP2
				RP9
				RPA1
				RPE65
				RPGR
				RPGRIP1
				RPGRIP1L
				RPL11
				RPL15
				RPL18
				RPL26
				RPL27
				RPL31
				RPL35
				RPL35A
				RPL5
				RPS10
				RPS15A
				RPS17
				RPS19
				RPS24
				RPS26
				RPS27
				RPS28
				RPS29
				RPS6KA3
				RPS7
				RRAS2
				RRM2B
				RS1
				RSPH1
				RSPH3
				RSPH4A
				RSPH9
				RTEL1
				RTN2
				RUNX1
				RUNX2
				RYR1
				RYR2
				SACS
				SAG
				SALL1
				SALL4
				SAMD9
				SAMD9L
				SAMHD1
				SAR1B
				SATB2
				SBDS
				SBF2
				SC5D
				SCAPER
				SCARB2
				SCFD1
				SCLT1
				SCN10A
				SCN11A
				SCN1A
				SCN1B
				SCN2B
				SCN3A
				SCN3B
				SCN4A
				SCN5A
				SCN8A
				SCN9A
				SCO2
				SDCCAG8
				SDHA
				SDHAF2
				SDHB
				SDHC
				SDHD
				SDR42E2
				SDR9C7
				SEMA3A
				SEMA3E
				SEMA4A
				SERAC1
				SERPINA1
				SERPINE1
				SETBP1
				SETD1B
				SETD2
				SETX
				SFTPA1
				SFTPA2
				SFTPC
				SGCD
				SGCE
				SGPL1
				SGSH
				SH2D1A
				SH3BP2
				SH3TC2
				SHANK3
				SHH
				SHOX
				SIL1
				SIX1
				SIX3
				SKI
				SKIC2
				SKIC3
				SLC12A5
				SLC12A6
				SLC16A1
				SLC16A2
				SLC17A5
				SLC17A8
				SLC19A1
				SLC19A2
				SLC19A3
				SLC20A2
				SLC22A5
				SLC24A5
				SLC25A1
				SLC25A13
				SLC25A15
				SLC25A19
				SLC25A20
				SLC25A24
				SLC26A2
				SLC26A4
				SLC26A5
				SLC27A4
				SLC2A1
				SLC2A10
				SLC2A2
				SLC30A10
				SLC33A1
				SLC35A1
				SLC35A2
				SLC35C1
				SLC37A4
				SLC39A14
				SLC39A8
				SLC3A1
				SLC45A2
				SLC46A1
				SLC4A1
				SLC52A1
				SLC52A2
				SLC52A3
				SLC5A7
				SLC6A1
				SLC6A3
				SLC6A5
				SLC6A8
				SLC7A14
				SLC7A7
				SLC7A9
				SLC9A6
				SLCO1B1
				SLCO1B3
				SLMAP
				SLX4
				SMAD2
				SMAD3
				SMAD4
				SMAD9
				SMARCA2
				SMARCA4
				SMARCAL1
				SMARCB1
				SMARCC2
				SMARCD1
				SMARCE1
				SMC1A
				SMC3
				SMCHD1
				SMN1
				SMN2
				SMO
				SMPD1
				SMPX
				SMS
				SNAP25
				SNCA
				SNRNP200
				SOD1
				SON
				SOS 1
				SOS 2
				SOST
				SOX10
				SOX11
				SOX2
				SOX3
				SOX4
				SOX8
				SOX9
				SP110
				SPAG1
				SPART
				SPAST
				SPATA7
				SPEF2
				SPG11
				SPG7
				SPINK1
				SPP2
				SPR
				SPRED1
				SPRY4
				SPTBN2
				SPTBN4
				SPTLC1
				SQSTM1
				SRA1
				SRCAP
				SRD5A3
				SRP54
				SRY
				SSR4
				ST3GAL5
				STAC3
				STAG2
				STAMBP
				STAT3
				STIL
				STK11
				STK36
				STN 1.00
				STRC
				STT3A
				STT3B
				STX11
				STX16
				STX1B
				STXBP1
				STXBP2
				SUCLA2
				SUCLG1
				SUFU
				SULT2B1
				SUMF1
				SUN1
				SUN2
				SUOX
				SURF1
				SYNE1
				SYNE2
				SYNE4
				SYNGAP1
				SYNJ1
				SYT2
				TAC3
				TACO1
				TACR3
				TAF1
				TAF15
				TAF8
				TAFAZZIN
				TANGO2
				TARDBP
				TAT
				TBC1D20
				TBC1D24
				TBCK
				TBK1
				TBP
				TBX1
				TBX4
				TBX5
				TBX6
				TCAP
				TCF4
				TCIRG1
				TCOF1
				TCTN1
				TCTN2
				TCTN3
				TDP1
				TECPR2
				TECRL
				TECTA
				TEK
				TERC
				TERT
				TET2
				TET3
				TFAP2A
				TFAP2B
				TFR2
				TGFB1
				TGFB2
				TGFB3
				TGFBR1
				TGFBR2
				TGIF1
				TGM1
				TH
				THAP1
				THAP11
				THBD
				THOC6
				TIMM8A
				TINF2
				TJP2
				TK2
				TMC1
				TMEM107
				TMEM127
				TMEM138
				TMEM165
				TMEM216
				TMEM231
				TMEM237
				TMEM43
				TMEM67
				TMIE
				TMPO
				TMPRSS3
				TNFAIP3
				TNFRSF1A
				TNNC1
				TNNI3
				TNNT2
				TNXB
				TOPORS
				TOR1A
				TP53
				TP63
				TP73
				TPK1
				TPM1
				TPP1
				TPRN
				TRAPPC2
				TRDN
				TREM2
				TREX1
				TRIM28
				TRIM32
				TRIM63
				TRIO
				TRIOBP
				TRMU
				TRNT1
				TRPM1
				TRPM3
				TRPM4
				TRPS1
				TRPV4
				TRPV6
				TSC1
				TSC2
				TSEN54
				TSR2
				TTBK2
				TTC12
				TTC19
				TTC21B
				TTC8
				TTN
				TTPA
				TTR
				TUBA1A
				TUBA4A
				TUBB
				TUBB2A
				TUBB2B
				TUBB3
				TUBB4A
				TUBB4B
				TUBG1
				TULP1
				TUSC3
				TWIST1
				TWNK
				TXNL4A
				TYMP
				TYR
				TYROBP
				TYRP1
				UBA1
				UBE2T
				UBE3A
				UBE3B
				UBQLN2
				UBR1
				UCP2
				UMOD
				UNC13A
				UNC13D
				UNC80
				UQCRC2
				UQCRQ
				UROD
				UROS
				USB1
				USH1C
				USH1G
				USH2A
				USP53
				USP7
				USP8
				USP9Y
				VAPB
				VCL
				VCP
				VHL
				VLDLR
				VPS13A
				VPS13B
				VPS13C
				VPS13D
				VPS16
				VPS35
				VTN
				VWA3A
				VWF
				WAC
				WARS2
				WAS
				WASHC5
				WDPCP
				WDR11
				WDR19
				WDR26
				WDR35
				WDR45
				WDR45B
				WDR62
				WDR72
				WFS1
				WHRN
				WNK1
				WNK4
				WNT10A
				WNT5A
				WRAP53
				WRN
				WT1
				XIAP
				XK
				XPA
				XPC
				XPR1
				XRCC2
				YARS1
				YIF1B
				YY1
				ZAP70
				ZBTB20
				ZCCHC8
				ZEB2
				ZFHX2
				ZFHX3
				ZFP57
				ZFYVE26
				ZIC2
				ZMYND10
				ZNF143
				ZNF408
				ZNF423
				ZNF462
				ZNF513
				GCSH

## Sheet: Supplementary Table 2
IEM genes not present in GeneReviews
Database	Gene	Disease_Names
Unique to Metabolic Treatabolome	AK2	Adenylate kinase 2 deficiency
Unique to Metabolic Treatabolome	AKT2	AKT2 superactivity
Unique to Metabolic Treatabolome	ALAD	Delta-aminolevulinic acid dehydratase deficiency
Unique to Metabolic Treatabolome	AMN	Amnionless deficiency
Unique to Metabolic Treatabolome	APOC2	Apolipoprotein C2 deficiency
Unique to Metabolic Treatabolome	ARSB	N-acetylgalactosamine 4-sulfatase deficiency
Unique to Metabolic Treatabolome	ATAD1	Thorase deficiency
Unique to Metabolic Treatabolome	ATP5F1B	ATP5F1B-related Mitochondrial ATP synthase betta-subunit deficiency
Unique to Metabolic Treatabolome	BPGM	BPGM- related Bisphosphoglycerate mutase deficiency
Unique to Metabolic Treatabolome	C2orf69	C2orf69-related Combined oxidative phosphorylation deficiency 53
Unique to Metabolic Treatabolome	CD320	Transcobalamin receptor deficiency
Unique to Metabolic Treatabolome	CTPS1	CTP synthase 1 deficiency
Unique to Metabolic Treatabolome	CYP11B1	11-beta-hydroxylase deficiency; 11-beta-hydroxylase superactivity
Unique to Metabolic Treatabolome	GPIHBP1	GPIHBP1 deficiency
Unique to Metabolic Treatabolome	HSD3B2	3-beta-hydroxysteroid dehydrogenase deficiency
Unique to Metabolic Treatabolome	JAGN1	Jagunal 1 deficiency
Unique to Metabolic Treatabolome	MC2R	ACTH receptor deficiency
Unique to Metabolic Treatabolome	MRAP	Melanocortin-2 receptor accessory protein deficiency
Unique to Metabolic Treatabolome	MTHFD1	Methylenetetrahydrofolate dehydrogenase 1 deficiency
Unique to Metabolic Treatabolome	NUP107	NUP107-related Nephrotic syndrome, type 11
Unique to Metabolic Treatabolome	OXCT1	Succinyl-CoA:3-oxoacid-CoA transferase deficiency
Unique to Metabolic Treatabolome	PDXK	Pyridoxal kinase deficiency
Unique to Metabolic Treatabolome	PIK3CG	PIK3CG-related Immunodeficiency 97 with autoinflammation
Unique to Metabolic Treatabolome	RBM28	RBM28-related Alopecia, neurologic defects, and endocrinopathy syndrome
Unique to Metabolic Treatabolome	SEC23B	Congenital dyserythropoietic anemia type 2
Unique to Metabolic Treatabolome	SI	Congenital sucrase-isomaltase deficiency
Unique to Metabolic Treatabolome	SLC25A32	Mitochondrial flavin adenine dinucleotide transporter deficiency
Unique to Metabolic Treatabolome	SLC25A36	SLC25A36-related Mitochondrial pyrimidine nucleotide carrier 2 deficiency
Unique to Metabolic Treatabolome	SLC27A5	Bile acid CoA ligase deficiency
Unique to Metabolic Treatabolome	SLC31A1	SLC31A1-related High-affinity copper transporter (CTR1) deficiency
Unique to Metabolic Treatabolome	SLC39A7	SLC39A7-related Zinc transporter deficiency
Unique to Metabolic Treatabolome	SLC40A1	Ferroportin deficiency
Unique to Metabolic Treatabolome	SLC51A	SLC51A-related Cholestasis, progressive familial intrahepatic, 6
Unique to Metabolic Treatabolome	SLC6A6	Taurine transporter deficiency
Unique to Metabolic Treatabolome	STAR	Steroidogenic acute regulatory protein deficiency
Unique to Metabolic Treatabolome	UMPS	Uridine monophosphate synthase deficiency
Unique to Metabolic Treatabolome	UQCRC1	UQCRC1-related Parkinsonism with polyneuropathy
Unique to DDIEM	AASS	Alpha-aminoadipic semialdehyde synthase deficiency
Unique to DDIEM	ABCC2	Canalicular bilirubin glucuronide transporter deficiency
Unique to DDIEM	ABHD5	CGI-58 deficiency
Unique to DDIEM	ACAD8	Isobutyryl-CoA dehydrogenase deficiency
Unique to DDIEM	ACADSB	2-Methylbutyryl-CoA dehydrogenase deficiency
Unique to DDIEM	ALDH4A1	Pyrroline-5-carboxylate dehydrogenase deficiency
Unique to DDIEM	ALDH6A1	Methylmalonate semialdehyde dehydrogenase deficiency
Unique to DDIEM	ALDOA	Aldolase A deficiency
Unique to DDIEM	AMPD1	Myoadenylate deaminase deficiency
Unique to DDIEM	AP2S1	AP2S1 deficiency
Unique to DDIEM	AUH	3-methylglutaconyl-CoA hydratase deficiency
Unique to DDIEM	B3GALNT2	B3GALNT2-CDG
Unique to DDIEM	B4GAT1	B4GAT1-CDG
Unique to DDIEM	CRAT	Carnitine acetyltransferase deficiency
Unique to DDIEM	CRPPA	CRPPA-CDG
Unique to DDIEM	CTH	Cystathionine gamma-lyase deficiency
Unique to DDIEM	CTSA	Cathepsin A deficiency
Unique to DDIEM	CTSC	Cathepsin C deficiency
Unique to DDIEM	CUBN	Cubilin deficiency
Unique to DDIEM	D2HGDH	D-2-hydroxyglutarate dehydrogenase deficiency
Unique to DDIEM	DHCR24	24-dehydrocholesterol reductase deficiency
Unique to DDIEM	DNA2	DNA2 helicase deficiency
Unique to DDIEM	DNAJC19	TIMM14 deficiency
Unique to DDIEM	DPYD	Dihydropyrimidine dehydrogenase deficiency
Unique to DDIEM	DPYS	Dihydropyrimidinase deficiency
Unique to DDIEM	ENO3	Enolase beta deficiency
Unique to DDIEM	FKRP	FKRP-CDG
Unique to DDIEM	FTCD	Formimidoyltransferase cyclodeaminase deficiency
Unique to DDIEM	GLYCTK	D-glycerate kinase deficiency
Unique to DDIEM	GNMT	Glycine N-methyltransferase deficiency
Unique to DDIEM	GSS	Glutathione synthetase deficiency
Unique to DDIEM	HPD	4-hydroxyphenylpyruvate dioxygenase deficiency; Hawkinsinuria
Unique to DDIEM	HSD17B10	HSD10 disease
Unique to DDIEM	LARGE1	LARGE1-CDG
Unique to DDIEM	LBR	Sterol C14 reductase deficiency
Unique to DDIEM	LDHA	Lactate dehydrogenase A deficiency
Unique to DDIEM	LDHB	Lactate dehydrogenase B deficiency
Unique to DDIEM	LIPC	Hepatic lipase deficiency
Unique to DDIEM	LPIN1	Lipin 1 deficiency
Unique to DDIEM	MANBA	Beta-mannosidase deficiency
Unique to DDIEM	MAT1A	Methionine adenosyltransferase I/III deficiency
Unique to DDIEM	MLYCD	Malonyl-CoA decarboxylase deficiency
Unique to DDIEM	MRPL44	Mitochondrial ribosomal large subunit 44 deficiency
Unique to DDIEM	MT-TE	Mitochondrial tRNA-Glu deficiency
Unique to DDIEM	NAGA	Alpha-N-acetylgalactosaminidase deficiency
Unique to DDIEM	PFKM	Muscle phosphofructokinase deficiency
Unique to DDIEM	PIGT	PIGT-CDG
Unique to DDIEM	POGLUT1	POGLUT1-CDG
Unique to DDIEM	POLG2	Mitochondrial DNA polymerase gamma accessory subunit deficiency
Unique to DDIEM	POMGNT2	POMGNT2-CDG
Unique to DDIEM	POMK	POMK-CDG
Unique to DDIEM	POMT1	POMT1-CDG
Unique to DDIEM	POMT2	POMT2-CDG
Unique to DDIEM	PRODH	Proline dehydrogenase deficiency
Unique to DDIEM	RNASEH1	Mitochondrial ribonuclease H1 deficiency
Unique to DDIEM	RXYLT1	RXYLT1-CDG
Unique to DDIEM	SLC1A1	Dicarboxylic aminoaciduria
Unique to DDIEM	SLC25A4	Adenine nucleotide translocator deficiency
Unique to DDIEM	SLC36A2	Hyperglycinuria; Iminoglycinuria
Unique to DDIEM	SLC6A19	Hartnup disorder
Unique to DDIEM	SLC6A20	Iminoglycinuria
Unique to DDIEM	SUGCT	Succinate-hydroxymethylglutarate-CoA transferase deficiency
Unique to DDIEM	TDO2	Tryptophan 2,3-dioxygenase deficiency
Unique to DDIEM	TOP3A	Topoisomerase 3 alpha deficiency
Unique to DDIEM	UGT1A1	UDP-glucuronosyltransferase A1 deficiency
Metabolic Treatabolome & Treatable ID only	ACAD9	ACAD9 deficiency
Metabolic Treatabolome & Treatable ID only	AHCY	S-adenosylhomocysteine hydrolase deficiency
Metabolic Treatabolome & Treatable ID only	BCKDK	Branched-chain ketoacid dehydrogenase kinase deficiency
Metabolic Treatabolome & Treatable ID only	CAD	CAD trifunctional protein deficiency
Metabolic Treatabolome & Treatable ID only	DNAJC12	DNAJC12 deficiency
Metabolic Treatabolome & Treatable ID only	FARSB	Phenylalanyl-tRNA synthetase subunit beta deficiency
Metabolic Treatabolome & Treatable ID only	GOT2	Mitochondrial aspartate aminotransferase deficiency
Metabolic Treatabolome & Treatable ID only	HLCS	Holocarboxylase synthetase deficiency
Metabolic Treatabolome & Treatable ID only	HMGCS2	Mitochondrial 3-hydroxy-3-methylglutaryl-CoA synthase deficiency
Metabolic Treatabolome & Treatable ID only	IARS1	Isoleucyl-tRNA synthetase 1 deficiency
Metabolic Treatabolome & Treatable ID only	LARS1	Leucyl-tRNA synthetase 1 deficiency
Metabolic Treatabolome & Treatable ID only	MTHFS	5,10-methenyltetrahydrofolate synthetase deficiency
Metabolic Treatabolome & Treatable ID only	NAXE	NAD(P)HX epimerase deficiency
Metabolic Treatabolome & Treatable ID only	NFE2L2	NRF2 superactivity
Metabolic Treatabolome & Treatable ID only	PIGO	PIGO-CDG
Metabolic Treatabolome & Treatable ID only	SARS1	Seryl-tRNA synthetase 1 deficiency
Metabolic Treatabolome & Treatable ID only	SLC18A2	Vesicular monoamine transporter 2 deficiency
Metabolic Treatabolome & Treatable ID only	SLC25A12	Mitochondrial aspartate-glutamate carrier isoform 1 deficiency
Metabolic Treatabolome & Treatable ID only	SLC5A6	Sodium-dependent multivitamin transporter deficiency
Metabolic Treatabolome & Treatable ID only	TCN2	Transcobalamin II deficiency
Metabolic Treatabolome & Treatable ID only	TMLHE	Epsilon-N-trimethyllysine hydroxylase deficiency
Metabolic Treatabolome & DDIEM only	ABAT	GABA transaminase deficiency
Metabolic Treatabolome & DDIEM only	APOA5	Apolipoprotein A5 deficiency
Metabolic Treatabolome & DDIEM only	CBLIF	Hereditary intrinsic factor deficiency
Metabolic Treatabolome & DDIEM only	CYP17A1	17-hydroxylase/17,20-lyase deficiency
Metabolic Treatabolome & DDIEM only	GALK1	Galactokinase deficiency
Metabolic Treatabolome & DDIEM only	GYS2	Hepatic glycogen synthase deficiency
Metabolic Treatabolome & DDIEM only	LCAT	Lecithin:cholesterol acyltransferase deficiency
Metabolic Treatabolome & DDIEM only	LMF1	Lipase maturation factor 1 deficiency
Metabolic Treatabolome & DDIEM only	MCCC1	3-Methylcrotonyl-CoA carboxylase 1 deficiency
Metabolic Treatabolome & DDIEM only	MCCC2	3-Methylcrotonyl-CoA carboxylase 2 deficiency
Metabolic Treatabolome & DDIEM only	OAT	Ornithine aminotransferase deficiency
Metabolic Treatabolome & DDIEM only	PCBD1	Pterin-4-alpha-carbinolamine dehydratase deficiency
Metabolic Treatabolome & DDIEM only	SLC39A4	Acrodermatitis enteropathica
Metabolic Treatabolome & DDIEM only	SLC5A1	Intestinal sodium-glucose cotransporter 1 deficiency
Metabolic Treatabolome & DDIEM only	TF	Hereditary transferrin deficiency
In all three databases	ACAT1	Mitochondrial acetoacetyl-CoA thiolase deficiency
In all three databases	DHFR	Dihydrofolate reductase deficiency
In all three databases	FUCA1	Alpha-fucosidase deficiency
In all three databases	GLUL	Glutamine synthetase deficiency
In all three databases	HMGCL	3-hydroxy-3-methylglutaryl-CoA lyase deficiency
In all three databases	PIGA	PIGA-CDG
In all three databases	PIGM	PIGM-CDG
In all three databases	QDPR	Dihydropteridine reductase deficiency

## Sheet: Supplementary Table 3
Unified IEM genes set with targeted therapy (n = 155) + Supportive Treatment (n=501)
Category	Gene	Disease_Names	Num_Diseases
Unique to GeneReviews (Targeted Therapy)	ABCC6	ABCC6 deficiency	1
Unique to GeneReviews (Targeted Therapy)	ABCG5	Sitosterolemia due to ABCG5 deficiency	1
Unique to GeneReviews (Targeted Therapy)	ABCG8	Sitosterolemia due to ABCG8 deficiency	1
Unique to GeneReviews (Targeted Therapy)	CPOX	Coproporphyrinogen oxidase deficiency; Harderoporphyria	2
Unique to GeneReviews (Targeted Therapy)	DGKE	Diacylglycerol kinase epsilon deficiency	1
Unique to GeneReviews (Targeted Therapy)	ENPP1	Ectonucleotide pyrophosphatase/ phosphodiesterase 1 deficiency; Ectonucleotide pyrophosphatase/ phosphodiesterase 1 dimerization deficiency	2
Unique to GeneReviews (Targeted Therapy)	FMO3	Flavin monooxygenase 3 deficiency	1
Unique to GeneReviews (Targeted Therapy)	GALNS	N-acetylgalactosamine 6-sulfatase deficiency	1
Unique to GeneReviews (Targeted Therapy)	GPHN	Gephyrin deficiency	1
Unique to GeneReviews (Targeted Therapy)	GRHPR	Glyoxylate reductase/hydroxypyruvate reductase deficiency	1
Unique to GeneReviews (Targeted Therapy)	HCFC1	Methylmalonic aciduria and homocystinuria, cblX type	1
Unique to GeneReviews (Targeted Therapy)	HOGA1	4-hydroxy-2-oxoglutarate aldolase 1 deficiency	1
Unique to GeneReviews (Targeted Therapy)	INSR	Insulin receptor deficiency	1
Unique to GeneReviews (Targeted Therapy)	MOCS2	Molybdopterin synthase deficiency	1
Unique to GeneReviews (Targeted Therapy)	MOCS3	Molybdopterin synthase sulfurase deficiency	1
Unique to GeneReviews (Targeted Therapy)	MTTP	Microsomal triglyceride transfer protein deficiency	1
Unique to GeneReviews (Targeted Therapy)	ODC1	Ornithine decarboxylase superactivity	1
Unique to GeneReviews (Targeted Therapy)	PC	Pyruvate carboxylase deficiency	1
Unique to GeneReviews (Targeted Therapy)	PEPD	Prolidase deficiency	1
Unique to GeneReviews (Targeted Therapy)	PEX7	Peroxisomal targeting signal 2 receptor deficiency	1
Unique to GeneReviews (Targeted Therapy)	PHYH	Phytanoyl-CoA hydroxylase deficiency	1
Unique to GeneReviews (Targeted Therapy)	PIK3CA	Catalytic phosphatidylinositol 3-kinase subunit alpha superactivity	1
Unique to GeneReviews (Targeted Therapy)	PPOX	Protoporphyrinogen oxidase deficiency	1
Unique to GeneReviews (Targeted Therapy)	PRRT2	PRRT2 deficiency	1
Unique to GeneReviews (Targeted Therapy)	SMPD1	Acid sphingomyelinase deficiency	1
Unique to GeneReviews (Targeted Therapy)	STX11	Famillial hemophagocytic lymphohistiocytosis type 4	1
Unique to GeneReviews (Targeted Therapy)	STXBP2	Famillial hemophagocytic lymphohistiocytosis type 5	1
Unique to GeneReviews (Targeted Therapy)	TANGO2	TANGO2 deficiency	1
Unique to GeneReviews (Targeted Therapy)	THAP11	Methylmalonic aciduria and homocystinuria due to Ronin deficiency	1
Unique to GeneReviews (Targeted Therapy)	UNC13D	Famillial hemophagocytic lymphohistiocytosis type 3	1
Unique to GeneReviews (Targeted Therapy)	ZNF143	Methylmalonic aciduria and homocystinuria due to ZNF143 deficiency	1
Consensus 3 Databases (Targeted Therapy)	ABCC8	ATP-sensitive potassium channel regulatory subunit deficiency; ATP-sensitive potassium channel regulatory subunit superactivity	2
Consensus 3 Databases (Targeted Therapy)	ABCD1	X-linked adrenoleukodystrophy	1
Consensus 3 Databases (Targeted Therapy)	ARG1	Arginase deficiency	1
Consensus 3 Databases (Targeted Therapy)	ASL	Argininosuccinate lyase deficiency	1
Consensus 3 Databases (Targeted Therapy)	BCKDHA	Branched-chain ketoacid dehydrogenase E1 alpha deficiency	1
Consensus 3 Databases (Targeted Therapy)	BCKDHB	Branched-chain ketoacid dehydrogenase E1 beta deficiency	1
Consensus 3 Databases (Targeted Therapy)	BTD	Biotinidase deficiency	1
Consensus 3 Databases (Targeted Therapy)	CBS	Cystathionine beta-synthase deficiency	1
Consensus 3 Databases (Targeted Therapy)	CP	Hereditary ceruloplasmin deficiency	1
Consensus 3 Databases (Targeted Therapy)	CYP27A1	Sterol 27-hydroxylase deficiency	1
Consensus 3 Databases (Targeted Therapy)	DBT	Dihydrolipoyl transacylase deficiency	1
Consensus 3 Databases (Targeted Therapy)	DDC	Aromatic L-amino acid decarboxylase deficiency	1
Consensus 3 Databases (Targeted Therapy)	ETFA	Electron transfer flavoprotein subunit alpha deficiency	1
Consensus 3 Databases (Targeted Therapy)	ETFB	Electron transfer flavoprotein subunit beta deficiency	1
Consensus 3 Databases (Targeted Therapy)	ETFDH	Electron transfer flavoprotein dehydrogenase deficiency	1
Consensus 3 Databases (Targeted Therapy)	FOLR1	Folate receptor alpha deficiency	1
Consensus 3 Databases (Targeted Therapy)	GAMT	Guanidinoacetate methyltransferase deficiency	1
Consensus 3 Databases (Targeted Therapy)	GATM	Arginine:glycine amidinotransferase (AGAT) deficiency; Arginine:glycine amidinotransferase aggregation syndrome	2
Consensus 3 Databases (Targeted Therapy)	GCDH	Glutaryl-CoA dehydrogenase deficiency	1
Consensus 3 Databases (Targeted Therapy)	GCH1	Autosomal dominant GTP cyclohydrolase 1 deficiency; Autosomal recessive GTP cyclohydrolase 1 deficiency	2
Consensus 3 Databases (Targeted Therapy)	IDUA	Alpha-iduronidase deficiency	1
Consensus 3 Databases (Targeted Therapy)	IVD	Isovaleryl-CoA dehydrogenase deficiency	1
Consensus 3 Databases (Targeted Therapy)	MAN2B1	Alpha-mannosidase deficiency	1
Consensus 3 Databases (Targeted Therapy)	MMACHC	Epi-cblC; Methylmalonic aciduria and homocystinuria, cblC type	2
Consensus 3 Databases (Targeted Therapy)	MMADHC	Homocystinuria, cblDv1 type; Methylmalonic aciduria and homocystinuria, cblD type; Methylmalonic aciduria, cblDv2 type	3
Consensus 3 Databases (Targeted Therapy)	MTR	Methionine synthase deficiency	1
Consensus 3 Databases (Targeted Therapy)	MTRR	Methionine synthase reductase deficiency	1
Consensus 3 Databases (Targeted Therapy)	NPC1	Niemann-Pick disease type C1	1
Consensus 3 Databases (Targeted Therapy)	NPC2	Niemann-Pick disease type C2	1
Consensus 3 Databases (Targeted Therapy)	PAH	Phenylalanine hydroxylase deficiency	1
Consensus 3 Databases (Targeted Therapy)	PNPO	Pyridoxamine 5'-phosphate oxidase deficiency	1
Consensus 3 Databases (Targeted Therapy)	PRPS1	Phosphoribosylpyrophosphate synthetase deficiency; Phosphoribosylpyrophosphate synthetase superactivity	2
Consensus 3 Databases (Targeted Therapy)	SLC19A3	Thiamine transporter 2 deficiency	1
Consensus 3 Databases (Targeted Therapy)	SLC25A13	Citrin deficiency	1
Consensus 3 Databases (Targeted Therapy)	SLC2A1	GLUT1 deficiency	1
Consensus 3 Databases (Targeted Therapy)	TH	Tyrosine hydroxylase deficiency	1
Consensus 2 Databases (Targeted): Metabolic Treatabolome & Treatable ID	ABCD4	Methylmalonic aciduria and homocystinuria, cblJ type	1
Consensus 2 Databases (Targeted): Metabolic Treatabolome & Treatable ID	ALDH7A1	Alpha-aminoadipic semialdehyde dehydrogenase deficiency	1
Consensus 2 Databases (Targeted): Metabolic Treatabolome & Treatable ID	AMT	Nonketotic hyperglycinemia due to aminomethyltransferase deficiency	1
Consensus 2 Databases (Targeted): Metabolic Treatabolome & Treatable ID	ASS1	Argininosuccinate synthetase deficiency	1
Consensus 2 Databases (Targeted): Metabolic Treatabolome & Treatable ID	ATP7B	Copper-transporting ATPase subunit beta deficiency	1
Consensus 2 Databases (Targeted): Metabolic Treatabolome & Treatable ID	DHCR7	7-dehydrocholesterol reductase deficiency	1
Consensus 2 Databases (Targeted): Metabolic Treatabolome & Treatable ID	GLDC	Nonketotic hyperglycinemia due to glycine decarboxylase deficiency	1
Consensus 2 Databases (Targeted): Metabolic Treatabolome & Treatable ID	GRIN2A	Ionotropic glutamate receptor NMDA type subunit 2A dysregulation	1
Consensus 2 Databases (Targeted): Metabolic Treatabolome & Treatable ID	GUSB	Beta-glucuronidase deficiency	1
Consensus 2 Databases (Targeted): Metabolic Treatabolome & Treatable ID	IDS	Iduronate sulfatase deficiency	1
Consensus 2 Databases (Targeted): Metabolic Treatabolome & Treatable ID	LMBRD1	Methylmalonic aciduria and homocystinuria, cblF type	1
Consensus 2 Databases (Targeted): Metabolic Treatabolome & Treatable ID	MMAA	Methylmalonic aciduria, cblA type	1
Consensus 2 Databases (Targeted): Metabolic Treatabolome & Treatable ID	MMAB	Methylmalonic aciduria, cblB type	1
Consensus 2 Databases (Targeted): Metabolic Treatabolome & Treatable ID	MMUT	Methylmalonic aciduria due to methylmalonyl-CoA mutase deficiency	1
Consensus 2 Databases (Targeted): Metabolic Treatabolome & Treatable ID	MOCS1	Cyclic pyranopterin monophosphate synthase deficiency	1
Consensus 2 Databases (Targeted): Metabolic Treatabolome & Treatable ID	OTC	Ornithine transcarbamylase deficiency	1
Consensus 2 Databases (Targeted): Metabolic Treatabolome & Treatable ID	PCCA	Propionic acidemia due to propionyl-CoA carboxylase subunit alpha deficiency	1
Consensus 2 Databases (Targeted): Metabolic Treatabolome & Treatable ID	PCCB	Propionic acidemia due to propionyl-CoA carboxylase subunit beta deficiency	1
Consensus 2 Databases (Targeted): Metabolic Treatabolome & Treatable ID	PHGDH	3-phosphoglycerate dehydrogenase deficiency	1
Consensus 2 Databases (Targeted): Metabolic Treatabolome & Treatable ID	PSAT1	Phosphoserine aminotransferase deficiency	1
Consensus 2 Databases (Targeted): Metabolic Treatabolome & Treatable ID	PSPH	Phosphoserine phosphatase deficiency	1
Consensus 2 Databases (Targeted): Metabolic Treatabolome & Treatable ID	SLC25A15	Mitochondrial ornithine transporter deficiency	1
Consensus 2 Databases (Targeted): Metabolic Treatabolome & Treatable ID	SLC25A19	Mitochondrial thiamine pyrophosphate transporter deficiency	1
Consensus 2 Databases (Targeted): Metabolic Treatabolome & Treatable ID	SLC39A8	SLC39A8 deficiency	1
Consensus 2 Databases (Targeted): Metabolic Treatabolome & Treatable ID	SLC46A1	Proton-coupled folate transporter deficiency	1
Consensus 2 Databases (Targeted): Metabolic Treatabolome & Treatable ID	SLC6A8	Creatine transporter deficiency	1
Consensus 2 Databases (Targeted): Metabolic Treatabolome & Treatable ID	TAT	Tyrosine aminotransferase deficiency	1
Consensus 2 Databases (Targeted): Metabolic Treatabolome & DDIEM	ADA	Adenosine deaminase 1 deficiency; Adenosine deaminase superactivity	2
Consensus 2 Databases (Targeted): Metabolic Treatabolome & DDIEM	AGL	Glycogen debranching enzyme deficiency	1
Consensus 2 Databases (Targeted): Metabolic Treatabolome & DDIEM	ALPL	Tissue-nonspecific alkaline phosphatase deficiency	1
Consensus 2 Databases (Targeted): Metabolic Treatabolome & DDIEM	APOB	Apolipoprotein B deficiency; Hypercholesterolemia due to ligand-defective apo B	2
Consensus 2 Databases (Targeted): Metabolic Treatabolome & DDIEM	APRT	Adenine phosphoribosyltransferase deficiency	1
Consensus 2 Databases (Targeted): Metabolic Treatabolome & DDIEM	CPT1A	Carnitine palmitoyltransferase 1A deficiency	1
Consensus 2 Databases (Targeted): Metabolic Treatabolome & DDIEM	CTNS	Cystinosis	1
Consensus 2 Databases (Targeted): Metabolic Treatabolome & DDIEM	DLD	Dihydrolipoamide dehydrogenase deficiency	1
Consensus 2 Databases (Targeted): Metabolic Treatabolome & DDIEM	FBP1	Fructose-1,6-bisphosphatase deficiency	1
Consensus 2 Databases (Targeted): Metabolic Treatabolome & DDIEM	G6PC1	Glucose-6-phosphatase deficiency	1
Consensus 2 Databases (Targeted): Metabolic Treatabolome & DDIEM	GBA1	Glucocerebrosidase deficiency	1
Consensus 2 Databases (Targeted): Metabolic Treatabolome & DDIEM	GLA	Alpha-galactosidase A deficiency	1
Consensus 2 Databases (Targeted): Metabolic Treatabolome & DDIEM	HADHA	Trifunctional protein subunit alpha deficiency	1
Consensus 2 Databases (Targeted): Metabolic Treatabolome & DDIEM	HAMP	Hepcidin deficiency	1
Consensus 2 Databases (Targeted): Metabolic Treatabolome & DDIEM	HJV	Hemojuvelin deficiency	1
Consensus 2 Databases (Targeted): Metabolic Treatabolome & DDIEM	HMBS	Porphobilinogen deaminase deficiency	1
Consensus 2 Databases (Targeted): Metabolic Treatabolome & DDIEM	SAR1B	Chylomicron retention disease	1
Consensus 2 Databases (Targeted): Metabolic Treatabolome & DDIEM	SLC25A20	Carnitine-acylcarnitine translocase deficiency	1
Consensus 2 Databases (Targeted): Metabolic Treatabolome & DDIEM	SLC37A4	Glucose-6-phosphate transporter deficiency	1
Consensus 2 Databases (Targeted): Metabolic Treatabolome & DDIEM	TFR2	Transferrin receptor 2 deficiency	1
Consensus 2 Databases (Targeted): Metabolic Treatabolome & DDIEM	TTPA	Alpha-tocopherol transfer protein deficiency	1
Consensus 2 Databases (Targeted): Metabolic Treatabolome & DDIEM	UROD	Uroporphyrinogen decarboxylase deficiency	1
Consensus 2 Databases (Targeted): Metabolic Treatabolome & DDIEM	UROS	Uroporphyrinogen III synthase deficiency	1
Unique to Metabolic Treatabolome (Targeted Therapy)	ACADM	Medium-chain acyl-CoA dehydrogenase deficiency	1
Unique to Metabolic Treatabolome (Targeted Therapy)	ACADVL	Very long-chain acyl-CoA dehydrogenase deficiency	1
Unique to Metabolic Treatabolome (Targeted Therapy)	AGXT	Alanine-glyoxylate aminotransferase deficiency	1
Unique to Metabolic Treatabolome (Targeted Therapy)	ALAS2	Delta-aminolevulinic acid synthase deficiency; Delta-aminolevulinic acid synthase superactivity	2
Unique to Metabolic Treatabolome (Targeted Therapy)	ALDOB	Aldolase B deficiency	1
Unique to Metabolic Treatabolome (Targeted Therapy)	CPT2	Carnitine palmitoyltransferase 2 deficiency	1
Unique to Metabolic Treatabolome (Targeted Therapy)	CYP21A2	21-hydroxylase deficiency	1
Unique to Metabolic Treatabolome (Targeted Therapy)	FAH	Fumarylacetoacetase deficiency	1
Unique to Metabolic Treatabolome (Targeted Therapy)	GAA	Alpha-glucosidase deficiency	1
Unique to Metabolic Treatabolome (Targeted Therapy)	GALE	Galactose epimerase deficiency	1
Unique to Metabolic Treatabolome (Targeted Therapy)	GALNT3	GALNT3-CDG	1
Unique to Metabolic Treatabolome (Targeted Therapy)	GALT	Galactose-1-phosphate uridylyltransferase deficiency	1
Unique to Metabolic Treatabolome (Targeted Therapy)	GCSH	GCSH-related Glycine encephalopathy due to H protein deficiency	1
Unique to Metabolic Treatabolome (Targeted Therapy)	HADHB	Isolated mitochondrial long-chain ketoacyl-CoA thiolase deficiency; Trifunctional protein subunit beta deficiency	2
Unique to Metabolic Treatabolome (Targeted Therapy)	LPL	Lipoprotein lipase deficiency	1
Unique to Metabolic Treatabolome (Targeted Therapy)	MCEE	Methylmalonic aciduria due to methylmalonyl-CoA epimerase deficiency	1
Unique to Metabolic Treatabolome (Targeted Therapy)	PLPBP	Pyridoxal 5'-phosphate binding protein deficiency	1
Unique to Metabolic Treatabolome (Targeted Therapy)	SLC19A2	Thiamine transporter 1 deficiency	1
Unique to Metabolic Treatabolome (Targeted Therapy)	SLC22A5	Primary carnitine deficiency	1
Unique to Metabolic Treatabolome (Targeted Therapy)	SLC30A10	Hypermanganesemia with dystonia type 1	1
Unique to Metabolic Treatabolome (Targeted Therapy)	SLC39A14	SLC39A14 deficiency	1
Unique to Metabolic Treatabolome (Targeted Therapy)	SLC52A2	Riboflavin transporter 2 deficiency	1
Unique to Metabolic Treatabolome (Targeted Therapy)	SLC52A3	Riboflavin transporter 3 deficiency	1
Unique to Metabolic Treatabolome (Targeted Therapy)	TRMU	tRNA 5-methylaminomethyl-2-thiouridylate-methyltransferase deficiency	1
Unique to DDIEM (Targeted Therapy)	DBH	Dopamine beta-hydroxylase deficiency	1
Unique to DDIEM (Targeted Therapy)	FECH	Ferrochelatase deficiency	1
Unique to DDIEM (Targeted Therapy)	FXN	Frataxin deficiency	1
Unique to DDIEM (Targeted Therapy)	GATA1	GATA1 deficiency	1
Unique to DDIEM (Targeted Therapy)	HFE	Hereditary hemochromatosis type 1	1
Unique to DDIEM (Targeted Therapy)	HGD	Homogentisic acid oxidase deficiency	1
Unique to DDIEM (Targeted Therapy)	HPRT1	Hypoxanthine guanine phosphoribosyltransferase deficiency	1
Unique to DDIEM (Targeted Therapy)	LIPA	Lysosomal acid lipase deficiency	1
Unique to DDIEM (Targeted Therapy)	PHKA1	Muscle phosphorylase kinase subunit alpha 1 deficiency	1
Unique to DDIEM (Targeted Therapy)	PHKA2	Hepatic phosphorylase kinase subunit alpha 2 deficiency	1
Unique to DDIEM (Targeted Therapy)	PHKB	Phosphorylase kinase subunit beta deficiency	1
Unique to DDIEM (Targeted Therapy)	PHKG2	Hepatic phosphorylase kinase subunit gamma 2 deficiency	1
Unique to DDIEM (Targeted Therapy)	PYGL	Liver glycogen phosphorylase deficiency	1
Unique to DDIEM (Targeted Therapy)	SLC7A7	Lysinuric protein intolerance	1
Unique to GeneReviews (Supportive Treatment)	AARS1	Alanyl-tRNA synthetase 1 deficiency	1
Unique to GeneReviews (Supportive Treatment)	AARS2	Mitochondrial alanyl-tRNA synthetase deficiency	1
Unique to GeneReviews (Supportive Treatment)	ABCA12	ABCA12 lipid transporter deficiency	1
Unique to GeneReviews (Supportive Treatment)	ACADS	Short-chain acyl-CoA dehydrogenase deficiency	1
Unique to GeneReviews (Supportive Treatment)	ADA2	Adenosine deaminase 2 deficiency	1
Unique to GeneReviews (Supportive Treatment)	ADAR	RNA-specific adenosine deaminase 1 deficiency	1
Unique to GeneReviews (Supportive Treatment)	AFG3L2	m-AAA protease subunit AFG3L2 deficiency	1
Unique to GeneReviews (Supportive Treatment)	AGPAT2	Lysophosphatidic acid acyltransferase deficiency	1
Unique to GeneReviews (Supportive Treatment)	AIFM1	AIFM1 deficiency	1
Unique to GeneReviews (Supportive Treatment)	ALDH18A1	Delta-1-pyrroline-5-carboxylate synthase deficiency, cutis laxa phenotype; Delta-1-pyrroline-5-carboxylate synthase deficiency, spastic paraplegia phenotype	2
Unique to GeneReviews (Supportive Treatment)	ALG1	ALG1-CDG	1
Unique to GeneReviews (Supportive Treatment)	ALG11	ALG11-CDG	1
Unique to GeneReviews (Supportive Treatment)	ALG12	ALG12-CDG	1
Unique to GeneReviews (Supportive Treatment)	ALG13	ALG13-CDG	1
Unique to GeneReviews (Supportive Treatment)	ALG14	ALG14-CDG	1
Unique to GeneReviews (Supportive Treatment)	ALG2	ALG2-CDG	1
Unique to GeneReviews (Supportive Treatment)	ALG3	ALG3-CDG	1
Unique to GeneReviews (Supportive Treatment)	ALG6	ALG6-CDG	1
Unique to GeneReviews (Supportive Treatment)	ALG8	ALG8-CDG	1
Unique to GeneReviews (Supportive Treatment)	ALG9	ALG9-CDG	1
Unique to GeneReviews (Supportive Treatment)	ALOX12B	Arachidonate 12-lipoxygenase, R type deficiency	1
Unique to GeneReviews (Supportive Treatment)	ALOXE3	Arachidonate lipoxygenase 3 deficiency	1
Unique to GeneReviews (Supportive Treatment)	AMACR	Alpha-methylacyl-CoA racemase (AMACR) deficiency	1
Unique to GeneReviews (Supportive Treatment)	ANGPTL3	Angiopoietin-like 3 deficiency	1
Unique to GeneReviews (Supportive Treatment)	AP1B1	MEDNIK-like syndrome	1
Unique to GeneReviews (Supportive Treatment)	AP3B1	Hermansky-Pudlak syndrome type 2	1
Unique to GeneReviews (Supportive Treatment)	AP3D1	Hermansky-Pudlak syndrome type 10	1
Unique to GeneReviews (Supportive Treatment)	AP4B1	AP4B1 deficiency	1
Unique to GeneReviews (Supportive Treatment)	AP4E1	AP4E1 deficiency	1
Unique to GeneReviews (Supportive Treatment)	AP4M1	AP4M1 deficiency	1
Unique to GeneReviews (Supportive Treatment)	AP4S1	AP4S1 deficiency	1
Unique to GeneReviews (Supportive Treatment)	AP5Z1	AP5Z1 deficiency	1
Unique to GeneReviews (Supportive Treatment)	APPL1	APPL1 deficiency	1
Unique to GeneReviews (Supportive Treatment)	AR	Androgen receptor deficiency; X-linked spinal and bulbar muscular atrophy	2
Unique to GeneReviews (Supportive Treatment)	ASNS	Asparagine synthetase deficiency	1
Unique to GeneReviews (Supportive Treatment)	ASPA	Aspartoacylase deficiency	1
Unique to GeneReviews (Supportive Treatment)	ATP13A2	ATP13A2 deficiency	1
Unique to GeneReviews (Supportive Treatment)	ATP5MK	DAPIT deficiency	1
Unique to GeneReviews (Supportive Treatment)	ATP5PO	Mitochondrial ATP synthase F1 subunit O deficiency	1
Unique to GeneReviews (Supportive Treatment)	ATP6V0A2	ATP6V0A2-CDG	1
Unique to GeneReviews (Supportive Treatment)	B3GLCT	B3GLCT-CDG	1
Unique to GeneReviews (Supportive Treatment)	BLK	BLK deficiency	1
Unique to GeneReviews (Supportive Treatment)	BLOC1S3	Hermansky-Pudlak syndrome type 8	1
Unique to GeneReviews (Supportive Treatment)	BLOC1S6	Hermansky-Pudlak syndrome type 9	1
Unique to GeneReviews (Supportive Treatment)	BSCL2	Seipin deficiency; Seipin superactivity	2
Unique to GeneReviews (Supportive Treatment)	CERS3	Ceramide synthase 3 deficiency	1
Unique to GeneReviews (Supportive Treatment)	CETP	Cholesteryl ester transfer protein deficiency	1
Unique to GeneReviews (Supportive Treatment)	CHAT	Choline acetyltransferase deficiency	1
Unique to GeneReviews (Supportive Treatment)	CHCHD10	CHCHD10 deficiency	1
Unique to GeneReviews (Supportive Treatment)	CHRNE	Acetylcholine receptor subunit epsilon deficiency	1
Unique to GeneReviews (Supportive Treatment)	CHST3	CHST3-CDG	1
Unique to GeneReviews (Supportive Treatment)	CLCN2	Chloride channel 2 superactivity	1
Unique to GeneReviews (Supportive Treatment)	CLN5	CLN5 disease	1
Unique to GeneReviews (Supportive Treatment)	CLN8	CLN8 disease	1
Unique to GeneReviews (Supportive Treatment)	CLPB	CLPB deficiency	1
Unique to GeneReviews (Supportive Treatment)	CLPP	CLPP deficiency	1
Unique to GeneReviews (Supportive Treatment)	COA6	Cytochrome c oxidase assembly factor 6 deficiency	1
Unique to GeneReviews (Supportive Treatment)	COASY	Coenzyme A synthase deficiency	1
Unique to GeneReviews (Supportive Treatment)	COG1	Conserved oligomeric Golgi complex subunit 1 deficiency	1
Unique to GeneReviews (Supportive Treatment)	COG2	Conserved oligomeric Golgi complex subunit 2 deficiency	1
Unique to GeneReviews (Supportive Treatment)	COG4	Conserved oligomeric Golgi complex subunit 4 deficiency; Conserved oligomeric Golgi complex subunit 4 superactivity	2
Unique to GeneReviews (Supportive Treatment)	COG5	Conserved oligomeric Golgi complex subunit 5 deficiency	1
Unique to GeneReviews (Supportive Treatment)	COG6	Conserved oligomeric Golgi complex subunit 6 deficiency	1
Unique to GeneReviews (Supportive Treatment)	COG7	Conserved oligomeric Golgi complex subunit 7 deficiency	1
Unique to GeneReviews (Supportive Treatment)	COG8	Conserved oligomeric Golgi complex subunit 8 deficiency	1
Unique to GeneReviews (Supportive Treatment)	COQ2	Coenzyme Q2 polyprenyltranferase deficiency	1
Unique to GeneReviews (Supportive Treatment)	COQ4	Coenzyme Q4 deficiency	1
Unique to GeneReviews (Supportive Treatment)	COQ7	Coenzyme Q7 hydroxylase deficiency	1
Unique to GeneReviews (Supportive Treatment)	COQ8B	Coenzyme Q8B (ADCK4) deficiency	1
Unique to GeneReviews (Supportive Treatment)	COQ9	Coenzyme 9 deficiency	1
Unique to GeneReviews (Supportive Treatment)	COX10	Cytochrome c oxidase assembly factor 10 deficiency	1
Unique to GeneReviews (Supportive Treatment)	COX15	Cytochrome c oxidase assembly factor 15 deficiency	1
Unique to GeneReviews (Supportive Treatment)	COX4I1	Cytochrome c oxidase subunit 4I1 deficiency	1
Unique to GeneReviews (Supportive Treatment)	COX7B	Cytochrome c oxidase subunit 7B deficiency	1
Unique to GeneReviews (Supportive Treatment)	COX8A	Cytochrome c oxidase subunit 8A deficiency	1
Unique to GeneReviews (Supportive Treatment)	COXFA4	Cytochrome c oxidase subunit NDUFA4 (COXFA4) deficiency	1
Unique to GeneReviews (Supportive Treatment)	CPT1C	Carnitine palmitoyltransferase 1C deficiency	1
Unique to GeneReviews (Supportive Treatment)	CTSD	Cathepsin D deficiency	1
Unique to GeneReviews (Supportive Treatment)	CTSF	Cathepsin F deficiency	1
Unique to GeneReviews (Supportive Treatment)	CTSK	Cathepsin K deficiency	1
Unique to GeneReviews (Supportive Treatment)	CYP4F22	CYP4F22 omega hydroxylase deficiency	1
Unique to GeneReviews (Supportive Treatment)	CYP7B1	Oxysterol 7-alpha-hydroxylase deficiency	1
Unique to GeneReviews (Supportive Treatment)	DDHD1	DDHD1 deficiency	1
Unique to GeneReviews (Supportive Treatment)	DDOST	DDOST-CDG	1
Unique to GeneReviews (Supportive Treatment)	DGUOK	Mitochondrial deoxyguanosine kinase deficiency	1
Unique to GeneReviews (Supportive Treatment)	DHDDS	DHDDS-CDG	1
Unique to GeneReviews (Supportive Treatment)	DKC1	X-linked dyskeratosis congenita	1
Unique to GeneReviews (Supportive Treatment)	DNAJC21	Shwachman-Diamond syndrome, DNAJC21 type	1
Unique to GeneReviews (Supportive Treatment)	DNAJC6	DNAJC6 deficiency	1
Unique to GeneReviews (Supportive Treatment)	DNM1L	Dynamin-like protein 1 deficiency	1
Unique to GeneReviews (Supportive Treatment)	DNM2	Dynamin 2 deficiency	1
Unique to GeneReviews (Supportive Treatment)	DPAGT1	DPAGT1-CDG	1
Unique to GeneReviews (Supportive Treatment)	DPM1	DPM1-CDG	1
Unique to GeneReviews (Supportive Treatment)	DPM2	DPM2-CDG	1
Unique to GeneReviews (Supportive Treatment)	DPM3	DPM3-CDG	1
Unique to GeneReviews (Supportive Treatment)	DSE	DSE-CDG	1
Unique to GeneReviews (Supportive Treatment)	DTNBP1	Hermansky-Pudlak syndrome type 7	1
Unique to GeneReviews (Supportive Treatment)	DYNC1H1	DYNC1H1 deficiency	1
Unique to GeneReviews (Supportive Treatment)	EARS2	Mitochondrial glutamyl-tRNA synthetase deficiency	1
Unique to GeneReviews (Supportive Treatment)	EBP	Conradi-Hünermann syndrome; Male EBP disorder with Neurologic Defects (MEND syndrome)	2
Unique to GeneReviews (Supportive Treatment)	EFL1	Shwachman-Diamond syndrome type 2	1
Unique to GeneReviews (Supportive Treatment)	ELOVL5	Very long-chain fatty acid elongase 5 deficiency	1
Unique to GeneReviews (Supportive Treatment)	ELP1	Elongator complex protein 1 deficiency	1
Unique to GeneReviews (Supportive Treatment)	EMC1	EMC1 deficiency	1
Unique to GeneReviews (Supportive Treatment)	ENTPD1	Ectonucleoside triphosphate diphosphohydrolase 1 deficiency	1
Unique to GeneReviews (Supportive Treatment)	EPG5	EPG5 deficiency	1
Unique to GeneReviews (Supportive Treatment)	EPM2A	Laforin deficiency	1
Unique to GeneReviews (Supportive Treatment)	ERAL1	ERAL1 deficiency	1
Unique to GeneReviews (Supportive Treatment)	EXT1	Multiple hereditary exostoses type 1	1
Unique to GeneReviews (Supportive Treatment)	EXT2	Autosomal recessive EXT2-related syndrome; Multiple hereditary exostoses type 2	2
Unique to GeneReviews (Supportive Treatment)	FARS2	Mitochondrial phenylalanyl-tRNA synthetase deficiency	1
Unique to GeneReviews (Supportive Treatment)	FASTKD2	FASTKD2 deficiency	1
Unique to GeneReviews (Supportive Treatment)	FBXL4	FBXL4 deficiency	1
Unique to GeneReviews (Supportive Treatment)	FDFT1	Squalene synthase deficiency	1
Unique to GeneReviews (Supportive Treatment)	FH	Fumarate hydratase deficiency; Fumarate hydratase deficiency, tumoral phenotype	2
Unique to GeneReviews (Supportive Treatment)	FIG4	Phosphatidylinositol-3,5-bisphosphate 5-phosphatase deficiency, neurologic phenotype; Phosphatidylinositol-3,5-bisphosphate 5-phosphatase deficiency, neuroskeletal phenotype	2
Unique to GeneReviews (Supportive Treatment)	FOXRED1	FOXRED1 deficiency	1
Unique to GeneReviews (Supportive Treatment)	FTL	Ferritin light chain deficiency; Ferritin light chain superactivity; Hyperferritinemia-cataract syndrome	3
Unique to GeneReviews (Supportive Treatment)	G6PC3	Ubiquitous glucose-6-phosphatase deficiency	1
Unique to GeneReviews (Supportive Treatment)	GANAB	GANAB-CDG	1
Unique to GeneReviews (Supportive Treatment)	GARS1	Mitochondrial and cytoplasmic glycyl-tRNA synthetase deficiency	1
Unique to GeneReviews (Supportive Treatment)	GDAP1	GDAP1 deficiency	1
Unique to GeneReviews (Supportive Treatment)	GFM1	Mitochondrial elongation factor G1 deficiency	1
Unique to GeneReviews (Supportive Treatment)	GFM2	Mitochondrial elongation factor G2 deficiency	1
Unique to GeneReviews (Supportive Treatment)	GFPT1	GFPT1-CDG	1
Unique to GeneReviews (Supportive Treatment)	GGPS1	Geranylgeranyl pyrophosphate synthase deficiency	1
Unique to GeneReviews (Supportive Treatment)	GLRA1	Glycine receptor subunit alpha 1 deficiency	1
Unique to GeneReviews (Supportive Treatment)	GLRB	Glycine receptor subunit beta deficiency	1
Unique to GeneReviews (Supportive Treatment)	GM2A	GM2 activator protein deficiency	1
Unique to GeneReviews (Supportive Treatment)	GMPPA	GMPPA-CDG	1
Unique to GeneReviews (Supportive Treatment)	GMPPB	GMPPB-CDG	1
Unique to GeneReviews (Supportive Treatment)	GNPTAB	UDP-N-acetylglucosamine-1-phosphotransferase subunit alpha/beta deficiency	1
Unique to GeneReviews (Supportive Treatment)	GNPTG	UDP-N-acetylglucosamine-1-phosphotransferase subunit gamma deficiency	1
Unique to GeneReviews (Supportive Treatment)	GNS	N-acetylglucosamine 6-sulfatase deficiency	1
Unique to GeneReviews (Supportive Treatment)	GRIA2	Ionotropic glutamate receptor AMPA type subunit 2 deficiency	1
Unique to GeneReviews (Supportive Treatment)	GRN	Progranulin deficiency	1
Unique to GeneReviews (Supportive Treatment)	GTPBP3	tRNA 5-taurinomethyluridine modifier deficiency	1
Unique to GeneReviews (Supportive Treatment)	HAAO	3-hydroxyanthranilic acid 3,4-dioxygenase deficiency	1
Unique to GeneReviews (Supportive Treatment)	HARS2	Mitochondrial histidyl-tRNA synthetase deficiency	1
Unique to GeneReviews (Supportive Treatment)	HCCS	Holocytochrome c synthase deficiency	1
Unique to GeneReviews (Supportive Treatment)	HEXA	Beta-hexosaminidase subunit alpha deficiency	1
Unique to GeneReviews (Supportive Treatment)	HEXB	Beta-hexosaminidase subunit beta deficiency	1
Unique to GeneReviews (Supportive Treatment)	HGSNAT	Heparan-alpha-glucosaminide N-acetyltransferase deficiency	1
Unique to GeneReviews (Supportive Treatment)	HK1	Hemolytic anemia due to hexokinase deficiency; Hereditary motor and sensory neuropathy, Russe type; Retinitis pigmentosa type 79	3
Unique to GeneReviews (Supportive Treatment)	HNF1A	Hepatocyte nuclear factor-1 alpha deficiency	1
Unique to GeneReviews (Supportive Treatment)	HNF1B	Hepatocyte nuclear factor-1 beta deficiency	1
Unique to GeneReviews (Supportive Treatment)	HNF4A	Hepatocyte nuclear factor-4 alpha deficiency	1
Unique to GeneReviews (Supportive Treatment)	HPS1	Hermansky-Pudlak syndrome type 1	1
Unique to GeneReviews (Supportive Treatment)	HPS3	Hermansky-Pudlak syndrome type 3	1
Unique to GeneReviews (Supportive Treatment)	HPS4	Hermansky-Pudlak syndrome type 4	1
Unique to GeneReviews (Supportive Treatment)	HPS5	Hermansky-Pudlak syndrome type 5	1
Unique to GeneReviews (Supportive Treatment)	HPS6	Hermansky-Pudlak syndrome type 6	1
Unique to GeneReviews (Supportive Treatment)	HS6ST1	HS6ST1-CDG	1
Unique to GeneReviews (Supportive Treatment)	HSPD1	HSP60 deficiency	1
Unique to GeneReviews (Supportive Treatment)	HTRA2	HTRA2 deficiency	1
Unique to GeneReviews (Supportive Treatment)	IARS2	Mitochondrial isoleucyl-tRNA synthetase deficiency	1
Unique to GeneReviews (Supportive Treatment)	IDH3B	Mitochondrial NAD+-dependent isocitrate dehydrogenase 3 subunit beta deficiency	1
Unique to GeneReviews (Supportive Treatment)	IFIH1	MDA5 superactivity	1
Unique to GeneReviews (Supportive Treatment)	IL1RAPL1	IL1RAPL1 deficiency	1
Unique to GeneReviews (Supportive Treatment)	IMPDH1	Inosine-5'-monophosphate dehydrogenase deficiency	1
Unique to GeneReviews (Supportive Treatment)	INPP5E	Inositol polyphosphate 5-phosphatase E deficiency	1
Unique to GeneReviews (Supportive Treatment)	INPPL1	Phosphatidylinositol-3,4,5-trisphosphate 5-phosphatase deficiency	1
Unique to GeneReviews (Supportive Treatment)	ISCA1	ISCA1 deficiency	1
Unique to GeneReviews (Supportive Treatment)	ISCA2	ISCA2 deficiency	1
Unique to GeneReviews (Supportive Treatment)	ITPR1	Inositol-1,4,5-triphosphate receptor type 1 deficiency	1
Unique to GeneReviews (Supportive Treatment)	KCTD7	CLN14 disease	1
Unique to GeneReviews (Supportive Treatment)	KIF1A	KIF1A deficiency	1
Unique to GeneReviews (Supportive Treatment)	KIF5A	KIF5A deficiency	1
Unique to GeneReviews (Supportive Treatment)	KLF11	Krüppel-like factor 11 deficiency	1
Unique to GeneReviews (Supportive Treatment)	LAMP2	Lysosome-associated membrane protein 2 deficiency	1
Unique to GeneReviews (Supportive Treatment)	LARS2	Mitochondrial leucyl-tRNA synthetase deficiency	1
Unique to GeneReviews (Supportive Treatment)	LFNG	LFNG-CDG	1
Unique to GeneReviews (Supportive Treatment)	LIPT1	Lipoyltransferase 1 deficiency	1
Unique to GeneReviews (Supportive Treatment)	LONP1	LONP1 deficiency	1
Unique to GeneReviews (Supportive Treatment)	LPIN2	Lipin 2 deficiency	1
Unique to GeneReviews (Supportive Treatment)	LRRK2	LRRK2 deficiency	1
Unique to GeneReviews (Supportive Treatment)	LYST	Chediak-Higashi syndrome	1
Unique to GeneReviews (Supportive Treatment)	MAGT1	MAGT1-CDG	1
Unique to GeneReviews (Supportive Treatment)	MAN1B1	MAN1B1-CDG	1
Unique to GeneReviews (Supportive Treatment)	MAT2A	Methionine adenosyltransferase II deficiency	1
Unique to GeneReviews (Supportive Treatment)	MBTPS1	Site-1 protease deficiency	1
Unique to GeneReviews (Supportive Treatment)	MCOLN1	Mucolipin 1 deficiency	1
Unique to GeneReviews (Supportive Treatment)	MECR	Mitochondrial enoyl-CoA reductase deficiency	1
Unique to GeneReviews (Supportive Treatment)	MFF	Mitochondrial fission factor deficiency	1
Unique to GeneReviews (Supportive Treatment)	MFN2	Mitofusin 2 deficiency	1
Unique to GeneReviews (Supportive Treatment)	MGAT2	MGAT2-CDG	1
Unique to GeneReviews (Supportive Treatment)	MOGS	MOGS-CDG	1
Unique to GeneReviews (Supportive Treatment)	MPC1	Mitochondrial pyruvate carrier deficiency	1
Unique to GeneReviews (Supportive Treatment)	MPDU1	MPDU1-CDG	1
Unique to GeneReviews (Supportive Treatment)	MPV17	MPV17 deficiency	1
Unique to GeneReviews (Supportive Treatment)	MRPL3	Mitochondrial ribosomal large subunit 3 deficiency	1
Unique to GeneReviews (Supportive Treatment)	MRPS34	Mitochondrial ribosomal small subunit 34 deficiency	1
Unique to GeneReviews (Supportive Treatment)	MT-ATP6	Mitochondrial ATP synthase F0 subunit 6 deficiency	1
Unique to GeneReviews (Supportive Treatment)	MT-CYB	Mitochondrial cytochrome b deficiency	1
Unique to GeneReviews (Supportive Treatment)	MT-ND2	NADH dehydrogenase core subunit 2 deficiency	1
Unique to GeneReviews (Supportive Treatment)	MT-ND3	NADH dehydrogenase core subunit 3 deficiency	1
Unique to GeneReviews (Supportive Treatment)	MT-ND4L	NADH dehydrogenase core subunit 4L deficiency	1
Unique to GeneReviews (Supportive Treatment)	MT-RNR1	Mitochondrial ribosomal RNA 12S deficiency	1
Unique to GeneReviews (Supportive Treatment)	MT-TA	Mitochondrial tRNA-Ala deficiency	1
Unique to GeneReviews (Supportive Treatment)	MT-TD	Mitochondrial tRNA-Asp deficiency	1
Unique to GeneReviews (Supportive Treatment)	MT-TI	Mitochondrial tRNA-Ile deficiency	1
Unique to GeneReviews (Supportive Treatment)	MT-TL2	Mitochondrial tRNA-Leu 2 deficiency	1
Unique to GeneReviews (Supportive Treatment)	MT-TM	Mitochondrial tRNA-Met deficiency	1
Unique to GeneReviews (Supportive Treatment)	MT-TR	Mitochondrial tRNA-Arg deficiency	1
Unique to GeneReviews (Supportive Treatment)	MT-TT	Mitochondrial tRNA-Thr deficiency	1
Unique to GeneReviews (Supportive Treatment)	MT-TV	Mitochondrial tRNA-Val deficiency	1
Unique to GeneReviews (Supportive Treatment)	MT-TY	Mitochondrial tRNA-Tyr deficiency	1
Unique to GeneReviews (Supportive Treatment)	MTFMT	Mitochondrial methionyl-tRNA formyltransferase deficiency	1
Unique to GeneReviews (Supportive Treatment)	MTM1	Myotubularin 1 deficiency	1
Unique to GeneReviews (Supportive Treatment)	MTMR2	Myotubularin-related protein 2 deficiency	1
Unique to GeneReviews (Supportive Treatment)	MTO1	tRNA 5-carboxymethylaminomethyl transferase deficiency	1
Unique to GeneReviews (Supportive Treatment)	MTRFR	C12orf65 release factor deficiency	1
Unique to GeneReviews (Supportive Treatment)	NADSYN1	NAD synthetase 1 deficiency	1
Unique to GeneReviews (Supportive Treatment)	NAGLU	N-acetylglucosaminidase deficiency	1
Unique to GeneReviews (Supportive Treatment)	NARS1	Asparaginyl-tRNA synthetase 1 deficiency	1
Unique to GeneReviews (Supportive Treatment)	NARS2	Mitochondrial asparaginyl-tRNA synthetase deficiency	1
Unique to GeneReviews (Supportive Treatment)	NDUFA1	NADH dehydrogenase alpha subcomplex subunit 1 deficiency	1
Unique to GeneReviews (Supportive Treatment)	NDUFA10	NADH dehydrogenase alpha subcomplex subunit 10 deficiency	1
Unique to GeneReviews (Supportive Treatment)	NDUFA12	NADH dehydrogenase alpha subcomplex subunit 12 deficiency	1
Unique to GeneReviews (Supportive Treatment)	NDUFA2	NADH dehydrogenase alpha subcomplex subunit 2 deficiency	1
Unique to GeneReviews (Supportive Treatment)	NDUFA9	NADH dehydrogenase alpha subcomplex subunit 9 deficiency	1
Unique to GeneReviews (Supportive Treatment)	NDUFAF2	Complex I assembly factor 2 deficiency	1
Unique to GeneReviews (Supportive Treatment)	NDUFAF5	Complex I assembly factor 5 deficiency	1
Unique to GeneReviews (Supportive Treatment)	NDUFAF6	Complex I assembly factor 6 deficiency	1
Unique to GeneReviews (Supportive Treatment)	NDUFB11	NADH dehydrogenase beta subcomplex subunit 11 deficiency	1
Unique to GeneReviews (Supportive Treatment)	NDUFS1	NADH dehydrogenase iron-sulfur protein 1 deficiency	1
Unique to GeneReviews (Supportive Treatment)	NDUFS2	NADH dehydrogenase iron-sulfur protein 2 deficiency	1
Unique to GeneReviews (Supportive Treatment)	NDUFS3	NADH dehydrogenase iron-sulfur protein 3 deficiency	1
Unique to GeneReviews (Supportive Treatment)	NDUFS4	NADH dehydrogenase iron-sulfur protein 4 deficiency	1
Unique to GeneReviews (Supportive Treatment)	NDUFS7	NADH dehydrogenase iron-sulfur protein 7 deficiency	1
Unique to GeneReviews (Supportive Treatment)	NDUFS8	NADH dehydrogenase iron-sulfur protein 8 deficiency	1
Unique to GeneReviews (Supportive Treatment)	NDUFV1	NADH dehydrogenase flavoprotein 1 deficiency	1
Unique to GeneReviews (Supportive Treatment)	NEUROD1	Neurogenic differentiation factor 1 deficiency	1
Unique to GeneReviews (Supportive Treatment)	NGLY1	N-glycanase 1 deficiency	1
Unique to GeneReviews (Supportive Treatment)	NHLRC1	Malin deficiency	1
Unique to GeneReviews (Supportive Treatment)	NHP2	Autosomal recessive dyskeratosis congenita type 2	1
Unique to GeneReviews (Supportive Treatment)	NMNAT1	Nicotinamide mononucleotide adenylyl transferase 1 deficiency	1
Unique to GeneReviews (Supportive Treatment)	NOP10	Autosomal recessive dyskeratosis congenita type 1	1
Unique to GeneReviews (Supportive Treatment)	OPA3	OPA3 deficiency	1
Unique to GeneReviews (Supportive Treatment)	PANK2	Pantothenate kinase 2 deficiency	1
Unique to GeneReviews (Supportive Treatment)	PARN	Poly(A)-specific ribonuclease deficiency	1
Unique to GeneReviews (Supportive Treatment)	PAX4	PAX4 deficiency	1
Unique to GeneReviews (Supportive Treatment)	PCSK9	PCSK9 deficiency; PCSK9 superactivity	2
Unique to GeneReviews (Supportive Treatment)	PDK3	Pyruvate dehydrogenase kinase isoenzyme 3 superactivity	1
Unique to GeneReviews (Supportive Treatment)	PDSS1	Prenyl diphosphate synthase subunit 1 deficiency	1
Unique to GeneReviews (Supportive Treatment)	PDSS2	Prenyl diphosphate synthase subunit 2 deficiency	1
Unique to GeneReviews (Supportive Treatment)	PDX1	Insulin promoter factor 1 deficiency	1
Unique to GeneReviews (Supportive Treatment)	PET100	PET100 deficiency	1
Unique to GeneReviews (Supportive Treatment)	PEX1	Peroxin 1 deficiency	1
Unique to GeneReviews (Supportive Treatment)	PEX10	Peroxin 10 deficiency	1
Unique to GeneReviews (Supportive Treatment)	PEX11B	Peroxin 11B deficiency	1
Unique to GeneReviews (Supportive Treatment)	PEX12	Peroxin 12 deficiency	1
Unique to GeneReviews (Supportive Treatment)	PEX13	Peroxin 13 deficiency	1
Unique to GeneReviews (Supportive Treatment)	PEX14	Peroxin 14 deficiency	1
Unique to GeneReviews (Supportive Treatment)	PEX16	Peroxin 16 deficiency	1
Unique to GeneReviews (Supportive Treatment)	PEX19	Peroxin 19 deficiency	1
Unique to GeneReviews (Supportive Treatment)	PEX2	Peroxin 2 deficiency	1
Unique to GeneReviews (Supportive Treatment)	PEX26	Peroxin 26 deficiency	1
Unique to GeneReviews (Supportive Treatment)	PEX3	Peroxin 3 deficiency	1
Unique to GeneReviews (Supportive Treatment)	PEX5	Peroxin 5 deficiency; Peroxin 5 long isoform deficiency	2
Unique to GeneReviews (Supportive Treatment)	PEX6	Peroxin 6 deficiency	1
Unique to GeneReviews (Supportive Treatment)	PGM3	PGM3-CDG	1
Unique to GeneReviews (Supportive Treatment)	PI4KA	Phosphatidylinositol 4-kinase type 3 alpha deficiency	1
Unique to GeneReviews (Supportive Treatment)	PIK3CD	Catalytic phosphatidylinositol 3-kinase subunit delta superactivity	1
Unique to GeneReviews (Supportive Treatment)	PIK3R1	Phosphatidylinositol 3-kinase regulatory subunit 1 deficiency	1
Unique to GeneReviews (Supportive Treatment)	PIK3R2	Phosphatidylinositol 3-kinase regulatory subunit 2 superactivity	1
Unique to GeneReviews (Supportive Treatment)	PINK1	PINK1 deficiency	1
Unique to GeneReviews (Supportive Treatment)	PNKD	Paroxysmal nonkinesigenic dyskinesia type 1	1
Unique to GeneReviews (Supportive Treatment)	PNPLA1	Acylceramide transacylase deficiency	1
Unique to GeneReviews (Supportive Treatment)	PNPLA6	PNPLA6 deficiency	1
Unique to GeneReviews (Supportive Treatment)	POLR1B	Treacher Collins syndrome type 4	1
Unique to GeneReviews (Supportive Treatment)	POLR1C	POLR3-related leukodystrophy; Treacher Collins syndrome type 3	2
Unique to GeneReviews (Supportive Treatment)	POLR1D	Treacher Collins syndrome type 2	1
Unique to GeneReviews (Supportive Treatment)	POLR3A	POLR3-related leukodystrophy (hypomyelinating leukodystrophy type 7); Wiedemann-Rautenstrauch syndrome	2
Unique to GeneReviews (Supportive Treatment)	POLR3B	POLR3-related leukodystrophy (hypomyelinating leukodystrophy type 8)	1
Unique to GeneReviews (Supportive Treatment)	POR	Cytochrome P450 oxidoreductase deficiency	1
Unique to GeneReviews (Supportive Treatment)	PRKN	Parkin deficiency	1
Unique to GeneReviews (Supportive Treatment)	PRORP	RNase P catalytic subunit deficiency	1
Unique to GeneReviews (Supportive Treatment)	PTEN	Phosphatidylinositol-3,4,5-trisphosphate 3-phosphatase deficiency	1
Unique to GeneReviews (Supportive Treatment)	RAB18	RAB18 deficiency	1
Unique to GeneReviews (Supportive Treatment)	RAB3GAP1	RAB3GAP1 deficiency	1
Unique to GeneReviews (Supportive Treatment)	RAB3GAP2	RAB3GAP2 deficiency	1
Unique to GeneReviews (Supportive Treatment)	RAB7A	RAB7 deficiency	1
Unique to GeneReviews (Supportive Treatment)	RFT1	RFT1-CDG	1
Unique to GeneReviews (Supportive Treatment)	RFX6	RFX6 deficiency	1
Unique to GeneReviews (Supportive Treatment)	RMND1	RMND1 deficiency	1
Unique to GeneReviews (Supportive Treatment)	RMRP	Cartilage-hair hypoplasia (more severe form: anauxetic dysplasia type 1)	1
Unique to GeneReviews (Supportive Treatment)	RNASEH2A	Ribonuclease H2 subunit A deficiency	1
Unique to GeneReviews (Supportive Treatment)	RNASEH2B	Ribonuclease H2 subunit B deficiency	1
Unique to GeneReviews (Supportive Treatment)	RNASEH2C	Ribonuclease H2 subunit C deficiency	1
Unique to GeneReviews (Supportive Treatment)	SACS	Sacsin deficiency	1
Unique to GeneReviews (Supportive Treatment)	SBDS	Shwachman-Diamond syndrome type 1	1
Unique to GeneReviews (Supportive Treatment)	SBF2	Myotubularin-related protein 2 regulatory protein deficiency	1
Unique to GeneReviews (Supportive Treatment)	SCARB2	Glucocerebrosidase receptor deficiency	1
Unique to GeneReviews (Supportive Treatment)	SCO2	SCO2 deficiency	1
Unique to GeneReviews (Supportive Treatment)	SDHA	Succinate dehydrogenase subunit A deficiency; Succinate dehydrogenase subunit A deficiency, tumoral phenotype	2
Unique to GeneReviews (Supportive Treatment)	SDHAF2	Succinate dehydrogenase complex assembly factor 2 deficiency, tumoral phenotype	1
Unique to GeneReviews (Supportive Treatment)	SDHB	Succinate dehydrogenase subunit B deficiency; Succinate dehydrogenase subunit B deficiency, tumoral phenotype	2
Unique to GeneReviews (Supportive Treatment)	SDHC	Succinate dehydrogenase subunit C deficiency, tumoral phenotype	1
Unique to GeneReviews (Supportive Treatment)	SDHD	Succinate dehydrogenase subunit D deficiency; Succinate dehydrogenase subunit D deficiency, tumoral phenotype	2
Unique to GeneReviews (Supportive Treatment)	SDR9C7	SDR9C7 deficiency	1
Unique to GeneReviews (Supportive Treatment)	SERAC1	SERAC1 deficiency	1
Unique to GeneReviews (Supportive Treatment)	SGPL1	Sphingosine-1-phosphate lyase deficiency	1
Unique to GeneReviews (Supportive Treatment)	SGSH	Heparan N-sulfatase deficiency	1
Unique to GeneReviews (Supportive Treatment)	SLC19A1	Folate transporter 1 deficiency	1
Unique to GeneReviews (Supportive Treatment)	SLC25A24	Mitochondrial ATP-Mg/phosphate transporter deficiency	1
Unique to GeneReviews (Supportive Treatment)	SLC26A2	Sulfate transporter deficiency	1
Unique to GeneReviews (Supportive Treatment)	SLC27A4	Fatty acid transport protein 4 deficiency	1
Unique to GeneReviews (Supportive Treatment)	SLC2A10	L-dehydroascorbate transporter deficiency	1
Unique to GeneReviews (Supportive Treatment)	SLC33A1	Acetyl-CoA transporter deficiency	1
Unique to GeneReviews (Supportive Treatment)	SLC35A1	SLC35A1-CDG	1
Unique to GeneReviews (Supportive Treatment)	SLC3A1	Cystinuria type A	1
Unique to GeneReviews (Supportive Treatment)	SLC52A1	Riboflavin transporter 1 deficiency	1
Unique to GeneReviews (Supportive Treatment)	SLC5A7	Choline transporter deficiency	1
Unique to GeneReviews (Supportive Treatment)	SLC6A1	GABA transporter deficiency	1
Unique to GeneReviews (Supportive Treatment)	SLC6A3	Dopamine transporter deficiency	1
Unique to GeneReviews (Supportive Treatment)	SLC6A5	Glycine transporter 2 deficiency	1
Unique to GeneReviews (Supportive Treatment)	SLC7A14	Lysosomal cationic amino acid transporter deficiency	1
Unique to GeneReviews (Supportive Treatment)	SLC7A9	Cystinuria type B	1
Unique to GeneReviews (Supportive Treatment)	SLCO1B1	Rotor syndrome	1
Unique to GeneReviews (Supportive Treatment)	SLCO1B3	Rotor syndrome	1
Unique to GeneReviews (Supportive Treatment)	SMS	Spermine synthase deficiency	1
Unique to GeneReviews (Supportive Treatment)	SNAP25	SNAP25 deficiency	1
Unique to GeneReviews (Supportive Treatment)	SPART	Spartin deficiency	1
Unique to GeneReviews (Supportive Treatment)	SPG11	Spatacsin deficiency	1
Unique to GeneReviews (Supportive Treatment)	SPG7	Paraplegin deficiency	1
Unique to GeneReviews (Supportive Treatment)	SPTLC1	Serine palmitoyltransferase subunit 1 deficiency	1
Unique to GeneReviews (Supportive Treatment)	SRD5A3	SRD5A3-CDG	1
Unique to GeneReviews (Supportive Treatment)	SSR4	SSR4-CDG	1
Unique to GeneReviews (Supportive Treatment)	STT3A	STT3A-CDG	1
Unique to GeneReviews (Supportive Treatment)	STT3B	STT3B-CDG	1
Unique to GeneReviews (Supportive Treatment)	STX1B	Syntaxin 1B deficiency	1
Unique to GeneReviews (Supportive Treatment)	STXBP1	Syntaxin-binding protein 1 deficiency	1
Unique to GeneReviews (Supportive Treatment)	SUCLG1	GTP-specific succinyl-CoA synthetase subunit alpha deficiency	1
Unique to GeneReviews (Supportive Treatment)	SULT2B1	Hydroxysteroid sulfotransferase deficiency	1
Unique to GeneReviews (Supportive Treatment)	SUMF1	Formyl-glycine generating enzyme deficiency	1
Unique to GeneReviews (Supportive Treatment)	SUOX	Isolated sulfite oxidase deficiency	1
Unique to GeneReviews (Supportive Treatment)	SURF1	SURF1 deficiency	1
Unique to GeneReviews (Supportive Treatment)	SYNJ1	Synaptojanin 1 deficiency	1
Unique to GeneReviews (Supportive Treatment)	SYT2	Synaptotagmin 2 deficiency	1
Unique to GeneReviews (Supportive Treatment)	TACO1	TACO1 deficiency	1
Unique to GeneReviews (Supportive Treatment)	TBC1D24	TBC1D24 deficiency	1
Unique to GeneReviews (Supportive Treatment)	TBK1	TBK1 deficiency	1
Unique to GeneReviews (Supportive Treatment)	TCOF1	Treacher Collins syndrome type 1	1
Unique to GeneReviews (Supportive Treatment)	TECPR2	TECPR2 deficiency	1
Unique to GeneReviews (Supportive Treatment)	TIMM8A	TIMM8A deficiency	1
Unique to GeneReviews (Supportive Treatment)	TMEM165	TMEM165-CDG	1
Unique to GeneReviews (Supportive Treatment)	TOR1A	Torsin 1A deficiency	1
Unique to GeneReviews (Supportive Treatment)	TRAPPC2	Spondyloepiphyseal dysplasia tarda	1
Unique to GeneReviews (Supportive Treatment)	TREX1	3' repair exonuclease 1 deficiency	1
Unique to GeneReviews (Supportive Treatment)	TRNT1	CCA-adding tRNA-nucleotidyltransferase deficiency	1
Unique to GeneReviews (Supportive Treatment)	TSEN54	tRNA splicing endonuclease subunit 54 deficiency	1
Unique to GeneReviews (Supportive Treatment)	TTC19	TTC19 deficiency	1
Unique to GeneReviews (Supportive Treatment)	TUSC3	TUSC3-CDG	1
Unique to GeneReviews (Supportive Treatment)	TYMP	Thymidine phosphorylase deficiency	1
Unique to GeneReviews (Supportive Treatment)	TYR	Tyrosinase deficiency	1
Unique to GeneReviews (Supportive Treatment)	UCP2	Uncoupling protein 2 deficiency	1
Unique to GeneReviews (Supportive Treatment)	UQCRC2	UQCRC2 deficiency	1
Unique to GeneReviews (Supportive Treatment)	UQCRQ	UQCRQ deficiency	1
Unique to GeneReviews (Supportive Treatment)	VAPB	VAPB deficiency	1
Unique to GeneReviews (Supportive Treatment)	VLDLR	Very low-density lipoprotein receptor deficiency	1
Unique to GeneReviews (Supportive Treatment)	VPS13A	Choreoacanthocytosis	1
Unique to GeneReviews (Supportive Treatment)	VPS13B	Cohen syndrome	1
Unique to GeneReviews (Supportive Treatment)	VPS13C	VPS13C deficiency	1
Unique to GeneReviews (Supportive Treatment)	VPS13D	VPS13D deficiency	1
Unique to GeneReviews (Supportive Treatment)	WARS2	Mitochondrial tryptophanyl-tRNA synthetase deficiency	1
Unique to GeneReviews (Supportive Treatment)	WDR45	WDR45 deficiency	1
Unique to GeneReviews (Supportive Treatment)	YARS1	Tyrosyl-tRNA synthetase 1 deficiency	1
Unique to GeneReviews (Supportive Treatment)	ZFYVE26	Spastizin deficiency	1
Consensus 3 Databases (Supportive Treatment)	AGA	Aspartylglucosaminidase deficiency	1
Consensus 3 Databases (Supportive Treatment)	ATP7A	Copper-transporting ATPase subunit alpha deficiency; X-linked distal spinal muscular atrophy type 3	2
Consensus 3 Databases (Supportive Treatment)	COQ8A	Coenzyme Q8A (ADCK3) deficiency	1
Consensus 3 Databases (Supportive Treatment)	CPS1	Carbamoyl phosphate synthetase 1 deficiency	1
Consensus 3 Databases (Supportive Treatment)	ETHE1	Mitochondrial sulfur dioxygenase deficiency	1
Consensus 3 Databases (Supportive Treatment)	MTHFR	5,10-methylenetetrahydrofolate reductase deficiency	1
Consensus 3 Databases (Supportive Treatment)	PTS	6-pyruvoyl-tetrahydropterin synthase deficiency	1
Consensus 3 Databases (Supportive Treatment)	SLC35C1	SLC35C1-CDG	1
Consensus 3 Databases (Supportive Treatment)	SPR	Sepiapterin reductase deficiency	1
Consensus 2 Databases (Supportive): Metabolic Treatabolome & Treatable ID	ALDH5A1	Succinic semialdehyde dehydrogenase deficiency	1
Consensus 2 Databases (Supportive): Metabolic Treatabolome & Treatable ID	AP1S1	MEDNIK syndrome	1
Consensus 2 Databases (Supportive): Metabolic Treatabolome & Treatable ID	ARSA	Arylsulfatase A deficiency	1
Consensus 2 Databases (Supportive): Metabolic Treatabolome & Treatable ID	CA5A	Carbonic anhydrase VA deficiency	1
Consensus 2 Databases (Supportive): Metabolic Treatabolome & Treatable ID	COQ5	Coenzyme Q5 methyltransferase deficiency	1
Consensus 2 Databases (Supportive): Metabolic Treatabolome & Treatable ID	ECHS1	Mitochondrial short-chain enoyl-CoA hydratase 1 deficiency	1
Consensus 2 Databases (Supportive): Metabolic Treatabolome & Treatable ID	GRIN1	Ionotropic glutamate receptor NMDA type subunit 1 dysregulation	1
Consensus 2 Databases (Supportive): Metabolic Treatabolome & Treatable ID	GRIN2B	Ionotropic glutamate receptor NMDA type subunit 2B dysregulation	1
Consensus 2 Databases (Supportive): Metabolic Treatabolome & Treatable ID	GRIN2D	Ionotropic glutamate receptor NMDA type subunit 2D superactivity	1
Consensus 2 Databases (Supportive): Metabolic Treatabolome & Treatable ID	HIBCH	3-hydroxyisobutyryl-CoA hydrolase deficiency	1
Consensus 2 Databases (Supportive): Metabolic Treatabolome & Treatable ID	MARS1	Methionyl-tRNA synthetase 1 deficiency	1
Consensus 2 Databases (Supportive): Metabolic Treatabolome & Treatable ID	MFSD8	CLN7 disease	1
Consensus 2 Databases (Supportive): Metabolic Treatabolome & Treatable ID	NAGS	N-acetylglutamate synthase deficiency	1
Consensus 2 Databases (Supportive): Metabolic Treatabolome & Treatable ID	PDHA1	Pyruvate dehydrogenase E1 alpha deficiency	1
Consensus 2 Databases (Supportive): Metabolic Treatabolome & Treatable ID	PDP1	Pyruvate dehydrogenase phosphatase deficiency	1
Consensus 2 Databases (Supportive): Metabolic Treatabolome & Treatable ID	PMM2	PMM2-CDG	1
Consensus 2 Databases (Supportive): Metabolic Treatabolome & Treatable ID	SLC35A2	SLC35A2-CDG	1
Consensus 2 Databases (Supportive): Metabolic Treatabolome & Treatable ID	TPK1	Thiamine pyrophosphokinase deficiency	1
Consensus 2 Databases (Supportive): Metabolic Treatabolome & Treatable ID	TPP1	Tripeptidyl-peptidase 1 deficiency	1
Consensus 2 Databases (Supportive): Metabolic Treatabolome & DDIEM	AKR1D1	Delta-4-3-oxosteroid 5-beta-reductase deficiency	1
Consensus 2 Databases (Supportive): Metabolic Treatabolome & DDIEM	APOE	Apolipoprotein E deficiency; Apolipoprotein E superactivity; Lipoprotein glomerulopathy	3
Consensus 2 Databases (Supportive): Metabolic Treatabolome & DDIEM	GBE1	Glycogen branching enzyme deficiency	1
Consensus 2 Databases (Supportive): Metabolic Treatabolome & DDIEM	GLUD1	Glutamate dehydrogenase superactivity	1
Consensus 2 Databases (Supportive): Metabolic Treatabolome & DDIEM	GNE	UDP-N-acetylglucosamine-2-epimerase/N-acetylmannosamine kinase deficiency; UDP-N-acetylglucosamine-2-epimerase/N-acetylmannosamine kinase superactivity	2
Consensus 2 Databases (Supportive): Metabolic Treatabolome & DDIEM	HSD3B7	3-Beta-hydroxy-Delta-5-C27-steroid oxidoreductase deficiency	1
Consensus 2 Databases (Supportive): Metabolic Treatabolome & DDIEM	PGM1	PGM1-CDG	1
Consensus 2 Databases (Supportive): Metabolic Treatabolome & DDIEM	PYGM	Muscle glycogen phosphorylase deficiency	1
Consensus 2 Databases (Supportive): Metabolic Treatabolome & DDIEM	RPL11	Diamond-Blackfan anemia type 7	1
Consensus 2 Databases (Supportive): Metabolic Treatabolome & DDIEM	RPL35A	Diamond-Blackfan anemia type 5	1
Consensus 2 Databases (Supportive): Metabolic Treatabolome & DDIEM	RPL5	Diamond-Blackfan anemia type 6	1
Consensus 2 Databases (Supportive): Metabolic Treatabolome & DDIEM	RPS10	Diamond-Blackfan anemia type 9	1
Consensus 2 Databases (Supportive): Metabolic Treatabolome & DDIEM	RPS17	Diamond-Blackfan anemia type 4	1
Consensus 2 Databases (Supportive): Metabolic Treatabolome & DDIEM	RPS19	Diamond-Blackfan anemia type 1	1
Consensus 2 Databases (Supportive): Metabolic Treatabolome & DDIEM	RPS26	Diamond-Blackfan anemia type 10	1
Consensus 2 Databases (Supportive): Metabolic Treatabolome & DDIEM	RPS7	Diamond-Blackfan anemia type 8	1
Consensus 2 Databases (Supportive): Metabolic Treatabolome & DDIEM	SLC2A2	Glucose transporter 2 deficiency	1
Consensus 2 Databases (Supportive): Treatable ID & DDIEM	MT-ND1	NADH dehydrogenase core subunit 1 deficiency	1
Consensus 2 Databases (Supportive): Treatable ID & DDIEM	MT-ND4	NADH dehydrogenase core subunit 4 deficiency	1
Consensus 2 Databases (Supportive): Treatable ID & DDIEM	MT-ND6	NADH dehydrogenase core subunit 6 deficiency	1
Consensus 2 Databases (Supportive): Treatable ID & DDIEM	MT-TH	Mitochondrial tRNA-His deficiency	1
Consensus 2 Databases (Supportive): Treatable ID & DDIEM	MT-TL1	Mitochondrial tRNA-Leu 1 deficiency	1
Consensus 2 Databases (Supportive): Treatable ID & DDIEM	MT-TQ	Mitochondrial tRNA-Gln deficiency	1
Consensus 2 Databases (Supportive): Treatable ID & DDIEM	MT-TS1	Mitochondrial tRNA-Ser 1 deficiency	1
Consensus 2 Databases (Supportive): Treatable ID & DDIEM	MT-TS2	Mitochondrial tRNA-Ser 2 deficiency	1
Unique to Metabolic Treatabolome (Supportive Treatment)	ABCB11	Bile salt export pump deficiency	1
Unique to Metabolic Treatabolome (Supportive Treatment)	ABCB4	Phosphatidylcholine translocator deficiency	1
Unique to Metabolic Treatabolome (Supportive Treatment)	ALG5	ALG5-related Dolichyl-phosphate beta-glucosyltransferase deficiency-CDG	1
Unique to Metabolic Treatabolome (Supportive Treatment)	ATP8B1	Phosphatidylserine translocator deficiency	1
Unique to Metabolic Treatabolome (Supportive Treatment)	BAAT	Bile acid-CoA:amino acid N-acyltransferase deficiency	1
Unique to Metabolic Treatabolome (Supportive Treatment)	COQ6	Coenzyme Q6 monooxygenase deficiency	1
Unique to Metabolic Treatabolome (Supportive Treatment)	DLAT	Dihydrolipoamide acetyltransferase deficiency	1
Unique to Metabolic Treatabolome (Supportive Treatment)	GALC	Beta-galactosylceramidase deficiency	1
Unique to Metabolic Treatabolome (Supportive Treatment)	INS	Primary congenital insulin deficiency; Proinsulin cleavage deficiency	2
Unique to Metabolic Treatabolome (Supportive Treatment)	KCNJ11	ATP-sensitive potassium channel pore-forming subunit deficiency; ATP-sensitive potassium channel pore-forming subunit superactivity	2
Unique to Metabolic Treatabolome (Supportive Treatment)	LDLR	LDL receptor deficiency	1
Unique to Metabolic Treatabolome (Supportive Treatment)	LDLRAP1	LDL receptor adaptor protein 1 deficiency	1
Unique to Metabolic Treatabolome (Supportive Treatment)	NR1H4	Bile acid receptor deficiency	1
Unique to Metabolic Treatabolome (Supportive Treatment)	PDHB	Pyruvate dehydrogenase E1 beta deficiency	1
Unique to Metabolic Treatabolome (Supportive Treatment)	PDHX	Pyruvate dehydrogenase E3-binding protein deficiency	1
Unique to Metabolic Treatabolome (Supportive Treatment)	RPL15	Diamond-Blackfan anemia type 12	1
Unique to Metabolic Treatabolome (Supportive Treatment)	RPL18	Diamond-Blackfan anemia type 18	1
Unique to Metabolic Treatabolome (Supportive Treatment)	RPL26	Diamond-Blackfan anemia type 11	1
Unique to Metabolic Treatabolome (Supportive Treatment)	RPL27	Diamond-Blackfan anemia type 16	1
Unique to Metabolic Treatabolome (Supportive Treatment)	RPL35	Diamond-Blackfan anemia type 19	1
Unique to Metabolic Treatabolome (Supportive Treatment)	RPS15A	Diamond-Blackfan anemia type 20	1
Unique to Metabolic Treatabolome (Supportive Treatment)	RPS27	Diamond-Blackfan anemia type 17	1
Unique to Metabolic Treatabolome (Supportive Treatment)	RPS28	Diamond-Blackfan anemia type 15	1
Unique to Metabolic Treatabolome (Supportive Treatment)	RPS29	Diamond-Blackfan anemia type 13	1
Unique to Metabolic Treatabolome (Supportive Treatment)	RRM2B	Mitochondrial ribonucleotide reductase small subunit deficiency	1
Unique to Metabolic Treatabolome (Supportive Treatment)	SAMHD1	SAMHD1 deficiency	1
Unique to Metabolic Treatabolome (Supportive Treatment)	SLC16A1	Monocarboxylate transporter 1 deficiency; Monocarboxylate transporter 1 superactivity	2
Unique to Metabolic Treatabolome (Supportive Treatment)	TK2	Mitochondrial thymidine kinase deficiency	1
Unique to Metabolic Treatabolome (Supportive Treatment)	TSR2	Diamond-Blackfan anemia type 14	1
Unique to Metabolic Treatabolome (Supportive Treatment)	VPS16	VPS16-related Dystonia 30	1
Unique to Treatable ID (Supportive Treatment)	MT-CO1	Cytochrome c oxidase subunit 1 deficiency	1
Unique to Treatable ID (Supportive Treatment)	MT-CO2	Cytochrome c oxidase subunit 2 deficiency	1
Unique to Treatable ID (Supportive Treatment)	MT-CO3	Cytochrome c oxidase subunit 3 deficiency	1
Unique to Treatable ID (Supportive Treatment)	MT-ND5	NADH dehydrogenase core subunit 5 deficiency	1
Unique to Treatable ID (Supportive Treatment)	MT-TF	Mitochondrial tRNA-Phe deficiency	1
Unique to Treatable ID (Supportive Treatment)	MT-TW	Mitochondrial tRNA-Trp deficiency	1
Unique to DDIEM (Supportive Treatment)	ABCA1	Tangier disease	1
Unique to DDIEM (Supportive Treatment)	ASAH1	Acid ceramidase deficiency, inflammatory phenotype; Acid ceramidase deficiency, primary neurologic phenotype	2
Unique to DDIEM (Supportive Treatment)	B4GALT1	B4GALT1-CDG	1
Unique to DDIEM (Supportive Treatment)	BCS1L	BCS1L deficiency	1
Unique to DDIEM (Supportive Treatment)	CHKB	Choline kinase beta deficiency	1
Unique to DDIEM (Supportive Treatment)	CHST14	CHST14-CDG	1
Unique to DDIEM (Supportive Treatment)	CLN3	CLN3 disease	1
Unique to DDIEM (Supportive Treatment)	CLN6	CLN6 disease	1
Unique to DDIEM (Supportive Treatment)	DARS2	Mitochondrial aspartyl-tRNA synthetase deficiency	1
Unique to DDIEM (Supportive Treatment)	DNAJC5	CLN4 disease	1
Unique to DDIEM (Supportive Treatment)	DOLK	DOLK-CDG	1
Unique to DDIEM (Supportive Treatment)	FA2H	Fatty acid 2-hydroxylase deficiency	1
Unique to DDIEM (Supportive Treatment)	FKTN	FKTN-CDG	1
Unique to DDIEM (Supportive Treatment)	GCK	Glucokinase deficiency; Glucokinase superactivity	2
Unique to DDIEM (Supportive Treatment)	GGT1	Gamma-glutamyl transpeptidase deficiency	1
Unique to DDIEM (Supportive Treatment)	GK	Glycerol kinase deficiency	1
Unique to DDIEM (Supportive Treatment)	GLB1	Beta-galactosidase deficiency, GM1 gangliosidosis phenotype; Beta-galactosidase deficiency, Morquio syndrome phenotype	2
Unique to DDIEM (Supportive Treatment)	HADH	Short-chain 3-hydroxyacyl-CoA dehydrogenase deficiency	1
Unique to DDIEM (Supportive Treatment)	HSD17B4	D-bifunctional protein deficiency	1
Unique to DDIEM (Supportive Treatment)	KYNU	Kynureninase deficiency	1
Unique to DDIEM (Supportive Treatment)	L2HGDH	L-2-hydroxyglutarate dehydrogenase deficiency	1
Unique to DDIEM (Supportive Treatment)	LIAS	Lipoic acid synthase deficiency	1
Unique to DDIEM (Supportive Treatment)	LRPPRC	LRPPRC deficiency	1
Unique to DDIEM (Supportive Treatment)	MPI	MPI-CDG	1
Unique to DDIEM (Supportive Treatment)	MT-TC	Mitochondrial tRNA-Cys deficiency	1
Unique to DDIEM (Supportive Treatment)	MT-TK	Mitochondrial tRNA-Lys deficiency	1
Unique to DDIEM (Supportive Treatment)	MT-TP	Mitochondrial tRNA-Pro deficiency	1
Unique to DDIEM (Supportive Treatment)	MVK	Mevalonate kinase deficiency; Mevalonate kinase deficiency, porokeratosis phenotype	2
Unique to DDIEM (Supportive Treatment)	NSDHL	CK syndrome; Congenital Hemidysplasia with Ichthyosiform Erythroderma and Limb Defects (CHILD syndrome)	2
Unique to DDIEM (Supportive Treatment)	OCRL	Phosphatidylinositol-4,5-bisphosphate 5-phosphatase deficiency	1
Unique to DDIEM (Supportive Treatment)	PIGN	PIGN-CDG	1
Unique to DDIEM (Supportive Treatment)	PLA2G6	Phospholipase A2 group 6 deficiency	1
Unique to DDIEM (Supportive Treatment)	POLG	Mitochondrial DNA polymerase gamma catalytic subunit deficiency	1
Unique to DDIEM (Supportive Treatment)	POMGNT1	POMGNT1-CDG	1
Unique to DDIEM (Supportive Treatment)	PPT1	Palmitoyl-protein thioesterase 1 deficiency	1
Unique to DDIEM (Supportive Treatment)	RPS24	Diamond-Blackfan anemia type 3	1
Unique to DDIEM (Supportive Treatment)	SC5D	Sterol Delta-5-desaturase deficiency	1
Unique to DDIEM (Supportive Treatment)	SLC17A5	Sialin deficiency	1
Unique to DDIEM (Supportive Treatment)	SLC25A1	Mitochondrial citrate carrier deficiency	1
Unique to DDIEM (Supportive Treatment)	ST3GAL5	ST3GAL5-CDG	1
Unique to DDIEM (Supportive Treatment)	SUCLA2	ATP-specific succinyl-CoA synthetase subunit beta deficiency	1
Unique to DDIEM (Supportive Treatment)	TAFAZZIN	Tafazzin deficiency	1
Unique to DDIEM (Supportive Treatment)	TWNK	TWINKLE mitochondrial DNA helicase deficiency	1
